# Supplementary material for: Unidirectional alteration of methylation and hydroxymethylation at the promoters and differential gene expression in oral squamous cell carcinoma
Source: Front Genet. 2023 Oct 12;14:1269084. doi: 10.3389/fgene.2023.1269084 (PMC10603190; doi:10.3389/fgene.2023.1269084)
Supplement: Supplementary file 1 [file Table2.XLSX]

## Sheet: Supplementary Table 2
Supplementary Table 2. List of differentially hydroxymethylated regions
chr	start	end	FDR	methylation difference	number of CpG	Tumor group average β value	NAT group average β value
chr1	870192	870247	0.014058	-0.118557	5	0.030697	0.14925
chr1	937031	937088	0.036346	-0.101934	6	0.033569	0.1355
chr1	983034	983146	0.015806	-0.105755	13	0.026601	0.13236
chr1	1013855	1014019	0.00081763	-0.112052	8	0.030006	0.14206
chr1	1130566	1130802	0.0010959	-0.133447	11	0.028299	0.16175
chr1	1136390	1136783	0.048563	-0.111522	13	0.043267	0.15479
chr1	1219461	1219523	0.0094915	-0.129177	10	0.066474	0.19565
chr1	1244315	1244467	0.00486	-0.102296	15	0.052054	0.15435
chr1	1281961	1282075	0.0063573	-0.178581	7	0.021824	0.2004
chr1	1303055	1303298	0.00013768	-0.147233	16	0.018976	0.16621
chr1	1314021	1314080	0.00093787	-0.122836	5	0.018307	0.14114
chr1	1332408	1332550	0.026782	-0.130078	7	0.040144	0.17022
chr1	1333167	1333413	5.8566e-06	-0.111499	21	0.04878	0.16028
chr1	1354218	1354426	0.00061782	-0.125286	14	0.048209	0.17349
chr1	1354591	1354712	0.004837	-0.139366	11	0.050475	0.18984
chr1	1419105	1419209	0.0198	-0.114648	5	0.034776	0.14942
chr1	1430825	1430960	0.033993	-0.10374	11	0.040052	0.14379
chr1	1600890	1601065	0.026605	-0.150168	7	0.066998	0.21717
chr1	1627390	1628210	4.9023e-09	-0.106329	52	0.063426	0.16975
chr1	1686128	1686294	0.0062096	-0.153867	7	0.072	0.22587
chr1	1888554	1888795	0.0198	-0.123708	14	0.094413	0.21812
chr1	1988087	1988246	0.0076411	-0.109063	6	0.014069	0.12313
chr1	2190271	2190333	0.046731	-0.111072	7	0.040516	0.15159
chr1	2194048	2194119	0.037356	-0.125415	7	0.0699	0.19532
chr1	2212058	2212186	0.0019813	-0.173703	8	0.06342	0.23712
chr1	2220598	2221023	0.0015695	-0.159978	9	0.024704	0.18468
chr1	2239034	2239517	0.00088225	-0.121071	14	0.051871	0.17294
chr1	2246879	2247049	0.00486	-0.170389	6	0.034085	0.20447
chr1	2248058	2248875	1.5389e-05	-0.100588	25	0.06432	0.16491
chr1	2256422	2257055	0.0174	-0.10163	22	0.055206	0.15684
chr1	2258267	2258699	0.033998	-0.132173	11	0.061324	0.1935
chr1	2299121	2299172	0.010099	-0.159144	8	0.067119	0.22626
chr1	2300548	2300668	0.0198	-0.153693	5	0.066763	0.22046
chr1	2312436	2312616	0.0198	-0.133784	5	0.06533	0.19911
chr1	2372841	2372936	0.010099	-0.125253	8	0.046516	0.17177
chr1	2381292	2381398	0.0174	-0.136162	6	0.022585	0.15875
chr1	2413450	2413559	0.01365	-0.122483	7	0.045317	0.1678
chr1	2443685	2443905	2.0817e-10	0.14521	38	0.19626	0.051047
chr1	2513075	2513302	0.029598	-0.103996	10	0.049109	0.1531
chr1	2536513	2536893	0.036346	-0.130592	8	0.040117	0.17071
chr1	2537860	2538016	0.0086302	-0.171351	5	0.059284	0.23064
chr1	2552383	2552537	1.0895e-06	-0.204718	15	0.043422	0.24814
chr1	2594395	2594481	0.006974	-0.123097	8	0.044413	0.16751
chr1	2789309	2789442	0.016526	0.146286	11	0.19258	0.046299
chr1	2790071	2790182	0.00016373	0.138958	16	0.16362	0.024662
chr1	2854764	2854947	0.010099	-0.10184	8	0.015281	0.11712
chr1	2916687	2917100	0.00077438	-0.109972	20	0.044631	0.1546
chr1	2931832	2931914	0.031519	0.106928	5	0.1402	0.033277
chr1	2933878	2933959	0.0018027	0.115272	6	0.14514	0.029872
chr1	2974673	2974840	0.02657	0.105722	8	0.14324	0.037516
chr1	3064477	3064634	0.031519	-0.120188	5	0.039544	0.15973
chr1	3068348	3068411	0.0032867	0.144758	11	0.15588	0.011122
chr1	3070662	3070720	0.0064522	0.104551	11	0.13477	0.030224
chr1	3145643	3145694	0.036346	-0.142066	6	0.04827	0.19034
chr1	3169796	3169887	0.024092	-0.118218	9	0.029772	0.14799
chr1	3171479	3171660	0.014058	-0.140052	5	0.037034	0.17709
chr1	3292153	3292224	0.046731	-0.100773	5	0.037424	0.1382
chr1	3335349	3335846	0.0050058	-0.104917	13	0.04626	0.15118
chr1	3356226	3356609	0.0048293	-0.130609	18	0.025743	0.15635
chr1	3372376	3372663	0.024966	-0.107598	9	0.0779	0.1855
chr1	3396555	3396675	0.036346	-0.105647	8	0.050496	0.15614
chr1	3405483	3405548	0.018641	-0.133327	7	0.041052	0.17438
chr1	3408894	3409011	0.0094519	0.129523	7	0.16307	0.033545
chr1	3411713	3411770	0.031519	0.10787	5	0.13196	0.024091
chr1	3501833	3501958	0.0070243	0.102081	10	0.14989	0.047808
chr1	3665062	3665236	0.046731	-0.112433	6	0.03893	0.15136
chr1	3688460	3688751	0.0072909	-0.107337	14	0.040498	0.14784
chr1	3699537	3699867	0.0093912	-0.111742	17	0.048977	0.16072
chr1	3760874	3761014	0.0174	0.117249	6	0.16144	0.044195
chr1	4116487	4116848	0.025239	0.106217	6	0.12049	0.014276
chr1	4275356	4275763	0.0010669	-0.101388	6	0.01462	0.11601
chr1	4614965	4615111	0.046731	-0.119242	5	0.022784	0.14203
chr1	5372588	5372882	0.014664	0.111845	8	0.15736	0.045514
chr1	6099857	6100009	0.00018495	-0.193858	7	0.035553	0.22941
chr1	6288720	6288790	0.031519	-0.139439	5	0.031028	0.17047
chr1	6300811	6300936	0.025337	-0.1104	6	0.020291	0.13069
chr1	6454285	6454397	0.038483	0.102897	13	0.13965	0.036752
chr1	6489610	6489866	0.026843	-0.119817	7	0.030653	0.15047
chr1	6509459	6509611	0.014275	-0.138095	9	0.049271	0.18737
chr1	6582024	6582185	0.0198	-0.112026	5	0.048372	0.1604
chr1	6600241	6600580	0.036346	-0.109826	8	0.043925	0.15375
chr1	6603747	6603826	0.00486	0.116577	6	0.13001	0.013429
chr1	6904811	6904932	0.0031752	-0.120196	8	0.03429	0.15449
chr1	7332560	7332923	0.026831	0.132238	7	0.15367	0.021432
chr1	7455681	7455926	0.0049189	-0.10977	9	0.025716	0.13549
chr1	7701966	7702863	0.012115	-0.128747	13	0.054593	0.18334
chr1	7784779	7784863	0.0070819	-0.101597	8	0.036353	0.13795
chr1	7902613	7902752	0.018654	-0.138146	7	0.034131	0.17228
chr1	7941426	7941554	0.014058	-0.131885	5	0.049625	0.18151
chr1	7953272	7953470	0.047305	0.145267	9	0.2196	0.074336
chr1	7963117	7963476	0.036346	-0.104183	8	0.02948	0.13366
chr1	8097328	8097701	0.046731	-0.122444	6	0.042161	0.16461
chr1	8147147	8147433	0.046731	-0.129938	5	0.070766	0.2007
chr1	8211590	8211982	0.00012455	-0.121167	13	0.03659	0.15776
chr1	8340913	8341062	0.014058	0.113371	5	0.15504	0.041673
chr1	8455616	8456083	0.046731	-0.148522	8	0.058043	0.20657
chr1	8496390	8496724	0.018971	-0.127955	8	0.038345	0.1663
chr1	8876601	8877102	5.7303e-11	-0.161437	29	0.038495	0.19993
chr1	9257965	9258090	0.046731	-0.107401	9	0.055885	0.16329
chr1	9275336	9276231	0.00023336	-0.1152	18	0.029179	0.14438
chr1	9320583	9321053	0.0064551	-0.104524	15	0.071178	0.1757
chr1	9324694	9325103	0.00010089	-0.120509	19	0.049055	0.16956
chr1	9329525	9329854	0.03637	-0.125241	7	0.045584	0.17083
chr1	9340545	9340809	0.0058529	-0.1385	12	0.067495	0.20599
chr1	9532763	9533024	0.014058	-0.124472	7	0.058305	0.18278
chr1	9653090	9653230	0.0086302	-0.119568	5	0.013295	0.13286
chr1	9688621	9688913	0.0069802	-0.103777	13	0.036529	0.14031
chr1	9877985	9878097	0.031519	-0.140192	5	0.044094	0.18429
chr1	10028531	10028631	0.022151	-0.130721	10	0.053356	0.18408
chr1	10380302	10380427	0.046731	-0.130702	5	0.052254	0.18296
chr1	10535881	10536047	0.00029782	-0.151254	8	0.031811	0.18307
chr1	10716303	10716603	0.039142	-0.14545	10	0.090979	0.23643
chr1	10804563	10804727	0.025262	-0.122519	6	0.029974	0.15249
chr1	10824806	10825963	5.6755e-07	-0.124733	26	0.038868	0.1636
chr1	10837335	10837553	0.036346	-0.114262	8	0.030961	0.14522
chr1	10890556	10890743	0.0198	-0.10181	5	0.027056	0.12887
chr1	10968380	10968788	1.6342e-05	-0.133851	14	0.022434	0.15628
chr1	11068347	11068781	0.046731	-0.118558	8	0.043913	0.16247
chr1	11263192	11263314	0.0048461	-0.153084	10	0.044001	0.19708
chr1	11377824	11378153	0.046731	0.136594	5	0.19466	0.058062
chr1	11518808	11518956	0.036346	-0.100398	8	0.054454	0.15485
chr1	11627970	11628192	0.046731	0.116184	8	0.16883	0.052644
chr1	11720207	11720323	0.00099405	-0.106309	6	0.034581	0.14089
chr1	11730962	11731214	8.8668e-05	-0.162717	9	0.034788	0.1975
chr1	12042552	12042918	0.0017305	0.108499	20	0.17479	0.066286
chr1	12132316	12132752	0.0088753	-0.129083	11	0.042448	0.17153
chr1	12171694	12172146	0.0034041	-0.147035	9	0.062721	0.20976
chr1	12174013	12174408	0.036346	-0.158983	6	0.061328	0.22031
chr1	12177741	12178082	0.046676	-0.132341	9	0.071955	0.2043
chr1	12178984	12179444	4.7753e-06	-0.112769	20	0.040171	0.15294
chr1	12188757	12188838	0.031519	-0.145703	5	0.04107	0.18677
chr1	12479060	12479709	0.0034109	-0.124514	10	0.035086	0.1596
chr1	12596569	12596947	0.025233	-0.152714	6	0.08004	0.23275
chr1	12822437	12822726	0.036346	-0.128716	6	0.027762	0.15648
chr1	13401381	13401486	0.0198	0.126378	5	0.18291	0.05653
chr1	13664164	13665308	0.015885	-0.106542	11	0.050148	0.15669
chr1	13871751	13872167	0.046731	-0.153833	5	0.025873	0.17971
chr1	14337622	14337808	0.033216	-0.108793	9	0.039867	0.14866
chr1	14834967	14835328	0.046731	-0.130068	5	0.040859	0.17093
chr1	14995753	14996045	0.00017372	-0.104996	8	0.014884	0.11988
chr1	15116129	15116360	0.017813	0.10495	9	0.14664	0.041686
chr1	15314510	15314588	0.046731	0.106662	7	0.14692	0.04026
chr1	15337780	15337914	0.046731	-0.12753	6	0.046969	0.1745
chr1	15357242	15357491	0.002403	0.149761	10	0.19729	0.047532
chr1	15411613	15412120	0.021426	-0.105342	12	0.059474	0.16482
chr1	15439253	15439377	0.046731	0.125214	5	0.15682	0.031606
chr1	15494048	15494197	0.031519	0.177982	5	0.23059	0.052604
chr1	15832680	15832840	0.0034395	-0.17385	9	0.076071	0.24992
chr1	15952696	15953292	0.00020299	-0.150933	12	0.024755	0.17569
chr1	15957636	15958378	0.033355	-0.104363	11	0.04792	0.15228
chr1	16122887	16123275	0.00057561	-0.136556	7	0.030737	0.16729
chr1	16124047	16124148	0.0198	-0.134513	5	0.077663	0.21218
chr1	16278902	16279291	0.008688	-0.124504	11	0.064183	0.18869
chr1	18107858	18107909	0.048611	0.107601	9	0.14175	0.034144
chr1	18661735	18662289	0.0174	-0.104474	10	0.051758	0.15623
chr1	18910468	18910738	0.0198	-0.120699	5	0.023601	0.1443
chr1	18922802	18923785	3.6586e-05	-0.106555	21	0.05074	0.15729
chr1	18924473	18924588	0.046731	-0.107972	5	0.051734	0.15971
chr1	18947580	18947815	0.036346	-0.143901	6	0.070493	0.21439
chr1	19010940	19011074	0.0034254	-0.13878	9	0.030211	0.16899
chr1	19288356	19288519	0.0070213	-0.139434	10	0.052108	0.19154
chr1	19346044	19346212	0.0174	-0.160573	6	0.053633	0.21421
chr1	19367460	19367635	0.0198	-0.146581	5	0.07492	0.2215
chr1	19390279	19390915	0.011554	-0.107409	17	0.041996	0.1494
chr1	19443184	19444030	0.0069151	-0.103576	13	0.063625	0.1672
chr1	19477599	19477822	0.0198	-0.155325	5	0.039874	0.1952
chr1	19508853	19509160	0.036346	-0.120377	6	0.017766	0.13814
chr1	19877943	19878209	0.026683	-0.122234	10	0.035373	0.15761
chr1	19971071	19971389	0.01599	0.107643	13	0.13926	0.031619
chr1	20081442	20081695	0.046731	-0.100557	7	0.03901	0.13957
chr1	20612681	20612771	0.00030993	-0.222551	6	0.016197	0.23875
chr1	21023347	21023468	0.018775	-0.137431	8	0.07142	0.20885
chr1	21290908	21291290	0.036346	-0.111751	8	0.078724	0.19048
chr1	21317280	21317474	0.025239	-0.103748	6	0.027905	0.13165
chr1	21366729	21366987	0.046731	0.114175	8	0.16746	0.05329
chr1	21523518	21523799	0.0174	-0.107019	6	0.060119	0.16714
chr1	21587179	21587277	0.014058	-0.121665	7	0.040512	0.16218
chr1	21781425	21781791	0.0174	-0.106066	17	0.055837	0.1619
chr1	21892639	21892806	0.0198	-0.141764	5	0.044414	0.18618
chr1	21904373	21904493	0.0072437	-0.110548	9	0.051443	0.16199
chr1	21956190	21957182	0.021738	-0.116186	12	0.051922	0.16811
chr1	21965713	21966093	0.0023566	0.100214	9	0.12842	0.028208
chr1	22600390	22600493	0.046731	-0.101159	5	0.027956	0.12912
chr1	23274858	23274935	0.031519	-0.154983	5	0.048487	0.20347
chr1	23402263	23403099	0.038778	-0.117363	13	0.056138	0.1735
chr1	23557830	23558212	0.017755	-0.12784	9	0.065132	0.19297
chr1	23627287	23627553	0.014058	-0.118299	7	0.028859	0.14716
chr1	23909052	23909770	0.026605	-0.104318	16	0.063853	0.16817
chr1	24289879	24290422	0.00023771	-0.164218	15	0.063686	0.2279
chr1	24414862	24414953	0.031519	-0.165542	5	0.084016	0.24956
chr1	24534530	24534585	0.014058	0.120722	5	0.13841	0.017688
chr1	24577776	24577882	0.046731	0.12744	7	0.16177	0.034327
chr1	24641626	24641757	0.012122	-0.145321	6	0.058157	0.20348
chr1	24834626	24834693	0.0047868	-0.15933	8	0.033822	0.19315
chr1	24874993	24875109	0.046731	-0.139923	5	0.026152	0.16607
chr1	25544622	25544947	0.0016092	-0.138439	7	0.046743	0.18518
chr1	25549595	25549973	0.0024204	-0.132123	10	0.024654	0.15678
chr1	25640772	25641498	0.02869	-0.103432	12	0.047205	0.15064
chr1	25656936	25657015	0.046731	0.108633	6	0.17549	0.066858
chr1	25683839	25684120	0.014201	-0.123035	9	0.065504	0.18854
chr1	25809383	25809952	0.0041378	-0.112174	16	0.049354	0.16153
chr1	26032768	26033058	0.025335	-0.110262	6	0.023886	0.13415
chr1	26145978	26146118	0.0198	-0.114643	5	0.028576	0.14322
chr1	26637068	26637162	0.046731	-0.109158	8	0.038499	0.14766
chr1	26989051	26989335	0.046731	0.126241	5	0.1397	0.013454
chr1	26994876	26994996	0.018775	-0.102053	8	0.034161	0.13621
chr1	27006726	27006830	0.046731	-0.100438	6	0.039509	0.13995
chr1	27011158	27011209	0.0086302	-0.163839	5	0.027311	0.19115
chr1	27105485	27105710	0.046731	-0.140282	5	0.067899	0.20818
chr1	27154102	27154430	0.0017562	-0.11114	14	0.041458	0.1526
chr1	27232610	27232791	0.048466	0.140077	12	0.21233	0.072248
chr1	27357889	27358003	0.0198	-0.135712	5	0.052566	0.18828
chr1	27360740	27360811	0.013883	-0.107654	10	0.025931	0.13359
chr1	27450083	27450207	0.031519	-0.12805	5	0.039177	0.16723
chr1	27471422	27472114	0.04852	-0.102776	12	0.046731	0.14951
chr1	27477680	27478081	0.003368	0.128545	11	0.17484	0.046293
chr1	27522079	27522531	0.035718	-0.135134	8	0.049762	0.1849
chr1	27528929	27529225	0.043821	0.122019	9	0.17402	0.052003
chr1	27536936	27537092	0.046731	-0.149134	8	0.052818	0.20195
chr1	27575238	27575454	4.5954e-06	0.108782	17	0.12814	0.019354
chr1	27614450	27615114	2.1756e-05	-0.106337	20	0.034445	0.14078
chr1	27635129	27635298	0.0027856	-0.139142	15	0.057507	0.19665
chr1	27659169	27659667	0.0078282	-0.121078	12	0.051847	0.17293
chr1	27790230	27790376	0.046731	-0.141229	5	0.061317	0.20255
chr1	27852468	27852549	0.0198	0.104514	5	0.1322	0.027684
chr1	28235483	28235619	0.00059662	-0.126281	9	0.041008	0.16729
chr1	28529062	28529246	0.0042578	-0.152608	7	0.046807	0.19941
chr1	28576607	28576676	0.0030503	-0.120844	6	0.020126	0.14097
chr1	28886580	28886721	0.01002	-0.139833	8	0.066775	0.20661
chr1	29125167	29125304	0.025175	-0.121782	9	0.037163	0.15894
chr1	29134033	29134422	1.4898e-05	-0.110081	29	0.046843	0.15692
chr1	29182375	29182646	0.00069309	-0.1316	13	0.0478	0.1794
chr1	30217902	30218184	0.0026858	-0.158102	7	0.018534	0.17664
chr1	30413689	30413793	0.025267	0.19626	6	0.24158	0.045315
chr1	30618203	30618572	0.012134	-0.119618	6	0.028181	0.1478
chr1	30756603	30757125	3.8847e-05	-0.131989	10	0.013976	0.14596
chr1	30757581	30757754	0.00046987	-0.176702	13	0.054086	0.23079
chr1	31627457	31627906	0.0198	-0.119331	13	0.075008	0.19434
chr1	31832749	31832809	0.0086302	-0.213286	5	0.043075	0.25636
chr1	31980240	31980521	0.046731	0.130176	6	0.17486	0.044681
chr1	32448066	32448236	0.00994	-0.124958	8	0.029576	0.15453
chr1	32972778	32972915	0.00094815	0.125759	12	0.14683	0.021068
chr1	33341291	33341762	0.0174	-0.106965	10	0.050821	0.15779
chr1	35610728	35610962	0.0048293	-0.125966	8	0.029068	0.15503
chr1	35708765	35708849	0.046731	-0.115261	6	0.022018	0.13728
chr1	36100072	36100213	0.001508	-0.126109	9	0.055249	0.18136
chr1	36192708	36192765	0.046731	0.132461	5	0.16358	0.031115
chr1	36270403	36270828	0.04874	-0.12283	9	0.030451	0.15328
chr1	36321603	36322180	0.0174	-0.115593	27	0.057632	0.17323
chr1	36371409	36371991	0.026439	-0.114849	18	0.06523	0.18008
chr1	36378677	36378755	0.0071406	-0.162008	8	0.080425	0.24243
chr1	36596219	36596762	0.037493	-0.100139	7	0.015442	0.11558
chr1	37475422	37475662	0.0034389	-0.170703	9	0.048926	0.21963
chr1	37932492	37932723	0.014664	-0.127794	8	0.033818	0.16161
chr1	37997553	37997764	0.046731	-0.130795	6	0.051198	0.18199
chr1	38117683	38117892	0.046731	-0.107127	7	0.029097	0.13622
chr1	38123616	38123977	0.00099136	-0.121788	13	0.029385	0.15117
chr1	39076068	39076294	0.046731	-0.108063	8	0.045039	0.1531
chr1	39082276	39082348	0.0198	-0.15707	5	0.03093	0.188
chr1	39107143	39107581	0.014058	-0.147733	9	0.048306	0.19604
chr1	39559536	39559680	0.0023661	-0.140669	9	0.014639	0.15531
chr1	39913742	39913908	0.00055148	-0.12531	17	0.02646	0.15177
chr1	40099516	40099669	0.014058	0.103098	7	0.13315	0.030048
chr1	40277374	40277797	0.0086302	-0.122862	5	0.022677	0.14554
chr1	40304128	40304222	0.026809	-0.118638	7	0.031456	0.15009
chr1	40436786	40436885	0.046731	0.101398	8	0.16687	0.065472
chr1	40450837	40451202	0.00048744	-0.118329	12	0.017921	0.13625
chr1	40809464	40809893	0.047382	-0.117171	9	0.063336	0.18051
chr1	40853283	40853573	0.046731	-0.140522	6	0.033014	0.17354
chr1	40980744	40981669	0.026228	-0.11882	15	0.048231	0.16705
chr1	42950746	42951110	0.013355	0.123541	14	0.19275	0.069204
chr1	42954243	42954316	0.046731	0.127405	5	0.18741	0.060009
chr1	43147478	43147745	0.00081337	0.14156	8	0.15773	0.016172
chr1	43299911	43300125	0.03708	-0.118088	7	0.049004	0.16709
chr1	43536757	43537154	0.019033	-0.115146	11	0.046855	0.162
chr1	43549746	43550096	0.037684	-0.116683	10	0.040955	0.15764
chr1	43565927	43565986	0.046731	0.10864	5	0.13831	0.029675
chr1	43929551	43929982	0.029508	-0.103174	12	0.054082	0.15726
chr1	43936418	43936528	2.3622e-06	0.106971	20	0.11782	0.010848
chr1	43936537	43936681	4.281e-08	0.138499	20	0.14845	0.009948
chr1	44261255	44261388	9.3232e-06	-0.153657	13	0.052586	0.20624
chr1	44355607	44355802	0.018745	-0.142313	7	0.046997	0.18931
chr1	44417710	44418145	0.00050771	0.121695	29	0.15006	0.028363
chr1	44643910	44644227	0.0048554	-0.112747	8	0.039867	0.15261
chr1	44690941	44691150	0.030354	-0.126234	10	0.039022	0.16526
chr1	44801269	44802108	0.040986	-0.127067	15	0.06395	0.19102
chr1	44815456	44816113	0.046731	-0.101877	12	0.059306	0.16118
chr1	45327851	45327922	0.0030503	-0.169797	6	0.050793	0.22059
chr1	45610112	45610675	0.026397	-0.101001	8	0.023367	0.12437
chr1	46218477	46218841	0.046731	-0.119995	8	0.044047	0.16404
chr1	46299060	46300224	0.026182	-0.101489	11	0.045655	0.14714
chr1	46305130	46305252	0.018988	-0.100962	8	0.029848	0.13081
chr1	46393790	46394102	0.019552	-0.148393	11	0.032385	0.18078
chr1	46572459	46572585	0.0198	0.128674	5	0.14785	0.019175
chr1	47536552	47537117	0.0174	-0.147293	10	0.045827	0.19312
chr1	47769117	47769858	0.026511	-0.111521	8	0.045014	0.15654
chr1	47918819	47919123	0.0086302	-0.159318	5	0.021811	0.18113
chr1	47992751	47992882	0.0198	-0.136749	5	0.04338	0.18013
chr1	49928469	49928544	0.046731	0.131306	5	0.18461	0.053302
chr1	51127917	51128034	0.046731	0.127325	5	0.1452	0.017876
chr1	51602228	51602287	0.037159	0.121926	7	0.13552	0.013598
chr1	53687981	53688149	0.00045088	-0.115504	10	0.048861	0.16437
chr1	54390748	54390809	0.0018919	-0.109567	8	0.042106	0.15167
chr1	54404404	54404861	0.026228	-0.111746	11	0.072364	0.18411
chr1	54549270	54549411	0.031519	-0.113099	5	0.036714	0.14981
chr1	55212662	55212887	0.025239	-0.15449	6	0.062467	0.21696
chr1	55324669	55324851	0.018964	0.102062	8	0.12894	0.02688
chr1	55331490	55331649	0.031519	-0.164852	5	0.025534	0.19039
chr1	55400730	55400864	0.046731	-0.115687	5	0.021205	0.13689
chr1	55656277	55656426	0.0198	-0.141343	5	0.045663	0.18701
chr1	56516765	56517664	0.046731	-0.107402	7	0.063768	0.17117
chr1	56523776	56524388	0.0198	-0.129394	5	0.037936	0.16733
chr1	57090851	57091020	0.018697	0.139964	7	0.17381	0.033848
chr1	57393367	57393489	0.0198	-0.106376	5	0.02332	0.1297
chr1	58735702	58735828	0.046731	-0.142928	5	0.033131	0.17606
chr1	58814807	58815169	0.0198	-0.107376	14	0.063745	0.17112
chr1	59153520	59153587	0.012115	-0.119267	6	0.019126	0.13839
chr1	59369059	59369129	0.0041993	0.136296	7	0.18517	0.048876
chr1	60620273	60620390	0.0017299	-0.138121	5	0.027951	0.16607
chr1	61028988	61029059	0.00060259	0.172784	6	0.17824	0.0054563
chr1	61053028	61053263	0.010099	-0.132098	8	0.033514	0.16561
chr1	61101525	61101705	0.031519	-0.192791	5	0.078264	0.27105
chr1	61135883	61136094	0.0198	-0.159492	5	0.039207	0.1987
chr1	61203162	61204046	0.033709	-0.112338	11	0.048702	0.16104
chr1	61260278	61260649	0.046731	-0.114248	8	0.036501	0.15075
chr1	61335143	61335478	0.037703	-0.106874	10	0.040815	0.14769
chr1	61448272	61448472	0.014058	-0.108403	7	0.031291	0.13969
chr1	62336812	62337370	0.01497	-0.128934	11	0.04859	0.17752
chr1	62417999	62418090	0.0198	0.158221	5	0.20499	0.046773
chr1	63319649	63319882	1.4639e-10	0.138012	29	0.17747	0.039462
chr1	65041206	65041776	0.00938	-0.104202	10	0.038678	0.14288
chr1	65793003	65793135	0.00046718	0.113769	18	0.12564	0.011873
chr1	67285087	67285173	0.0086302	-0.121496	5	0.017004	0.1385
chr1	67754251	67754455	0.036346	-0.126066	6	0.037507	0.16357
chr1	67815837	67816279	0.02484	-0.136768	9	0.049492	0.18626
chr1	69120306	69120375	0.019001	0.130912	8	0.17473	0.043822
chr1	69577002	69577118	0.046731	-0.121162	5	0.0074176	0.12858
chr1	69759536	69760340	0.00060553	0.108846	14	0.13908	0.030236
chr1	69865624	69865817	0.0038139	0.106059	13	0.14499	0.038933
chr1	70116272	70116329	0.025149	0.129305	6	0.16416	0.034851
chr1	71371430	71371522	0.046731	-0.129577	7	0.020485	0.15006
chr1	71505429	71505572	0.00486	0.120055	8	0.14264	0.022583
chr1	71656601	71656659	0.036346	0.163637	8	0.19352	0.029886
chr1	71685407	71685677	0.046731	0.110121	7	0.16156	0.051437
chr1	71759382	71759498	0.046731	0.161083	5	0.2069	0.045815
chr1	72021994	72022083	0.036346	0.108818	6	0.14482	0.035999
chr1	74747362	74747464	0.02092	0.115146	10	0.15802	0.042875
chr1	75837546	75837687	0.031519	0.127055	5	0.1639	0.036847
chr1	77279279	77279536	0.0030817	0.124062	16	0.17751	0.053452
chr1	78838476	78838732	0.033273	0.108056	11	0.16735	0.059297
chr1	79347504	79347627	0.033692	0.110261	9	0.16173	0.051468
chr1	81445957	81446242	0.025262	-0.112592	6	0.033533	0.14613
chr1	83087145	83087248	0.00486	-0.189811	6	0.021424	0.21124
chr1	84572866	84573338	0.0174	-0.151127	6	0.073889	0.22502
chr1	84782623	84782774	0.046731	-0.100237	7	0.040196	0.14043
chr1	86307971	86308090	0.014058	0.140949	7	0.17516	0.034211
chr1	88983809	88983967	0.0034083	-0.142101	10	0.045744	0.18785
chr1	89127109	89127273	0.00031291	-0.204586	6	0.020561	0.22515
chr1	89762364	89762494	0.037639	-0.138677	7	0.020536	0.15921
chr1	89822361	89823138	0.016759	-0.106379	14	0.059292	0.16567
chr1	89844404	89844694	0.0198	-0.148425	5	0.031575	0.18
chr1	91732447	91732551	0.046731	-0.153537	5	0.039074	0.19261
chr1	91804653	91804962	0.046731	-0.106563	10	0.064109	0.17067
chr1	92951143	92951606	0.0198	-0.171024	5	0.054055	0.22508
chr1	93063623	93063722	0.0013378	0.146392	8	0.18658	0.040186
chr1	93575889	93576045	0.046731	-0.12149	6	0.043254	0.16474
chr1	93593959	93594017	0.0086302	-0.160916	5	0.028008	0.18892
chr1	93796475	93796628	0.0015355	0.109963	12	0.14045	0.030486
chr1	93845590	93845837	0.037164	-0.119269	7	0.027789	0.14706
chr1	93979171	93979533	0.001638	-0.151328	7	0.049729	0.20106
chr1	94098730	94098885	0.0086302	-0.122071	5	0.0099769	0.13205
chr1	94648318	94648493	0.0078014	-0.151114	6	0.025785	0.1769
chr1	95227915	95228165	0.0042595	0.105003	16	0.1461	0.041097
chr1	96519540	96519619	0.025239	0.135605	9	0.15842	0.022818
chr1	99381060	99381555	0.046731	0.115109	15	0.16418	0.049071
chr1	99765559	99765861	0.0001723	-0.13422	19	0.072719	0.20694
chr1	100539691	100539745	0.00020512	0.101361	13	0.1198	0.018436
chr1	101046739	101046817	0.046731	0.115479	5	0.14047	0.024996
chr1	101328685	101328775	0.046731	0.111925	5	0.17379	0.06187
chr1	101745111	101745550	0.00010099	0.114496	8	0.14045	0.02595
chr1	102480020	102480182	0.038726	0.119345	13	0.16972	0.050378
chr1	104217790	104217962	0.025239	0.111361	6	0.17799	0.066629
chr1	105553277	105553468	0.00031089	0.113039	13	0.1649	0.051865
chr1	107303725	107303810	0.046731	0.133729	5	0.16963	0.0359
chr1	107941210	107941527	0.026605	-0.10473	7	0.06565	0.17038
chr1	107969459	107969514	0.0030503	0.14982	5	0.15871	0.0088888
chr1	108278940	108279005	0.036346	0.131438	6	0.16675	0.035314
chr1	108486871	108487240	0.0032045	-0.111558	8	0.024281	0.13584
chr1	109079654	109079937	0.036164	-0.158718	8	0.048209	0.20693
chr1	109262961	109263713	1.0472e-05	-0.107661	22	0.040506	0.14817
chr1	109465550	109465623	0.031519	-0.126156	5	0.046339	0.1725
chr1	109508791	109509163	0.029166	-0.111916	12	0.039454	0.15137
chr1	109546849	109547566	0.037639	-0.14323	7	0.062981	0.20621
chr1	109643721	109643852	0.00057543	-0.202113	7	0.044899	0.24701
chr1	109807631	109807817	0.01976	-0.102395	11	0.045869	0.14826
chr1	109823686	109823865	0.046731	-0.17097	5	0.060946	0.23192
chr1	110406250	110406653	0.046731	-0.126353	8	0.088453	0.21481
chr1	110674617	110674774	1.5358e-11	0.106818	22	0.11521	0.0083956
chr1	110674863	110675021	2.4383e-07	0.105528	22	0.12052	0.014992
chr1	111720472	111721578	0.024287	-0.105527	13	0.073547	0.17907
chr1	111963932	111964357	0.046731	-0.12493	5	0.046794	0.17172
chr1	111972332	111972423	0.00064333	0.131638	9	0.16552	0.033878
chr1	112627516	112628378	0.02415	-0.121012	13	0.076573	0.19759
chr1	112898984	112899061	3.2119e-05	0.174468	8	0.19962	0.025151
chr1	112990517	112990689	0.0021142	-0.161039	8	0.038727	0.19977
chr1	113173062	113173275	0.033508	0.108049	11	0.162	0.053952
chr1	113212408	113212489	0.014058	0.105687	5	0.11793	0.012245
chr1	113906614	113906714	0.018664	-0.121243	7	0.067386	0.18863
chr1	114509212	114509378	0.0030503	-0.13544	5	0.024811	0.16025
chr1	115705171	115705373	0.036346	-0.104333	8	0.047107	0.15144
chr1	116825602	116826114	0.026454	-0.127577	8	0.060994	0.18857
chr1	116909486	116909644	0.001076	-0.13298	10	0.016495	0.14947
chr1	118985674	118986015	0.0065291	0.114686	11	0.14808	0.03339
chr1	119002354	119002583	0.0072996	-0.133816	9	0.039527	0.17334
chr1	121472188	121472610	0.046731	-0.131542	5	0.016489	0.14803
chr1	125066386	125066475	0.046731	0.11689	8	0.14315	0.026259
chr1	143340558	143340780	0.025214	-0.112758	9	0.064201	0.17696
chr1	143637746	143637923	0.014058	0.131508	15	0.19067	0.05916
chr1	144122587	144122725	0.031519	0.246715	5	0.26634	0.019624
chr1	144413848	144414073	0.03406	-0.126182	11	0.061985	0.18817
chr1	146051577	146051756	0.014557	-0.125369	8	0.055528	0.1809
chr1	146683111	146683315	0.036346	-0.105822	6	0.011174	0.117
chr1	147050860	147050942	0.046731	0.155446	6	0.18545	0.030005
chr1	147079705	147079837	0.037386	0.143262	7	0.16047	0.017203
chr1	147170378	147171144	0.047115	-0.10218	16	0.047609	0.14979
chr1	148079200	148079529	0.0029685	-0.101239	24	0.054032	0.15527
chr1	148523368	148523785	0.00027269	-0.103346	15	0.032739	0.13609
chr1	148776242	148776387	0.036346	-0.120706	6	0.045479	0.16618
chr1	149272793	149272863	0.046731	0.126851	7	0.17243	0.045582
chr1	149713235	149713377	0.046731	-0.133257	5	0.041783	0.17504
chr1	149936794	149936969	0.046731	-0.117695	8	0.067952	0.18565
chr1	150255456	150255831	0.046731	-0.119476	8	0.037559	0.15704
chr1	151016792	151016958	0.046731	-0.106911	9	0.020422	0.12733
chr1	151047027	151047104	0.025337	-0.10182	6	0.022899	0.12472
chr1	153493110	153493707	0.036346	-0.110713	10	0.062791	0.1735
chr1	153565028	153565107	0.0078014	-0.141199	6	0.081814	0.22301
chr1	154064839	154065316	0.046731	0.130811	7	0.16241	0.031598
chr1	154407587	154407833	0.036346	-0.119897	8	0.026309	0.14621
chr1	154433121	154433372	0.0198	-0.178226	5	0.043782	0.22201
chr1	154749222	154749612	0.036346	-0.150146	6	0.058519	0.20866
chr1	154867627	154868192	0.0020264	-0.12056	13	0.030773	0.15133
chr1	154984434	154984662	0.004837	-0.144417	11	0.063648	0.20806
chr1	155015677	155015797	0.036346	-0.103343	6	0.03761	0.14095
chr1	155025420	155025628	0.046731	-0.104004	7	0.045097	0.1491
chr1	155071519	155071849	0.033836	-0.113166	11	0.049182	0.16235
chr1	155125291	155125623	0.001272	-0.129931	14	0.056979	0.18691
chr1	155320972	155321111	0.018946	0.125057	8	0.16409	0.039038
chr1	155675832	155676019	0.014316	-0.123036	9	0.032626	0.15566
chr1	156502075	156502314	0.026233	-0.160251	11	0.11873	0.27898
chr1	156667131	156667551	0.018757	-0.137972	7	0.047418	0.18539
chr1	157754762	157754866	0.031519	0.111622	5	0.16269	0.05107
chr1	158396923	158397121	0.014575	-0.116153	8	0.013798	0.12995
chr1	158860778	158860967	0.030977	0.136195	10	0.18465	0.048458
chr1	158941971	158942047	0.0174	0.146492	6	0.17964	0.033146
chr1	159006172	159006360	0.046731	-0.127036	5	0.029037	0.15607
chr1	159113067	159113563	0.017813	-0.144524	9	0.050149	0.19467
chr1	159848944	159849114	0.038137	-0.118792	10	0.054468	0.17326
chr1	160263204	160263496	0.0049633	-0.115222	13	0.064169	0.17939
chr1	161154507	161154633	0.0010453	-0.10193	11	0.027156	0.12909
chr1	161480930	161481452	0.0012877	-0.115209	19	0.046307	0.16152
chr1	161529674	161529866	0.0016528	-0.116129	11	0.035571	0.1517
chr1	161616108	161616569	0.0081772	0.1114	13	0.1636	0.052196
chr1	161832425	161832576	0.0198	-0.111635	5	0.031133	0.14277
chr1	163875952	163876200	0.046731	-0.106143	5	0.04336	0.1495
chr1	164543420	164543567	0.046731	0.116995	5	0.14051	0.023514
chr1	164607045	164607857	0.026843	-0.100506	7	0.034022	0.13453
chr1	164790669	164791479	0.046019	-0.106725	9	0.067613	0.17434
chr1	165291933	165292131	0.021029	0.119524	10	0.17998	0.060451
chr1	165354553	165354673	0.036346	0.116529	6	0.15564	0.039107
chr1	166489831	166490301	0.00020299	-0.102696	17	0.03371	0.13641
chr1	166840468	166840753	0.0198	-0.128956	5	0.049623	0.17858
chr1	167430814	167430924	0.046731	-0.101349	6	0.073038	0.17439
chr1	168085612	168085780	0.04575	-0.120958	9	0.055551	0.17651
chr1	168218857	168219955	0.046731	-0.110285	11	0.060177	0.17046
chr1	168513285	168513579	0.0031984	-0.178414	8	0.036908	0.21532
chr1	168763278	168763670	0.0198	-0.111852	5	0.017385	0.12924
chr1	171670830	171670882	0.036346	0.105953	6	0.1389	0.032946
chr1	173669853	173669905	0.00074854	0.126234	11	0.15473	0.028498
chr1	174350269	174350383	0.036346	0.148664	8	0.19839	0.049727
chr1	175813832	175814052	0.018702	0.139608	7	0.1826	0.042992
chr1	177036210	177036346	0.025239	0.109058	6	0.14805	0.038988
chr1	178320336	178320491	0.0031445	-0.10008	8	0.040941	0.14102
chr1	178665185	178665578	0.046731	-0.109374	6	0.03148	0.14085
chr1	179294554	179294812	1.6596e-06	-0.176211	15	0.036328	0.21254
chr1	179668964	179669023	0.046731	0.160699	6	0.19823	0.037535
chr1	179743022	179743205	1.049e-05	0.122872	16	0.1408	0.017929
chr1	181131546	181132024	0.03757	-0.110483	7	0.055966	0.16645
chr1	181134705	181135392	0.019181	-0.115373	15	0.051441	0.16681
chr1	182145168	182145715	0.014574	-0.117725	8	0.072223	0.18995
chr1	182249220	182249562	2.9681e-05	-0.123357	9	0.011573	0.13493
chr1	182700436	182700578	0.031519	-0.148345	5	0.048385	0.19673
chr1	183234332	183234536	0.012115	-0.142694	6	0.049553	0.19225
chr1	183418146	183418261	0.018771	0.104336	7	0.11676	0.01242
chr1	183427120	183427404	0.026839	0.109419	7	0.12997	0.020551
chr1	184006349	184006444	0.046731	0.147278	6	0.17335	0.026076
chr1	187748531	187748682	0.026605	0.114486	8	0.20432	0.089837
chr1	187850235	187850356	0.039018	0.108535	10	0.12999	0.021458
chr1	188305935	188306164	6.0704e-05	0.145853	13	0.18053	0.034681
chr1	189827685	189827747	0.00047718	0.135833	5	0.15377	0.017934
chr1	190429773	190429883	0.0198	0.127844	5	0.15262	0.024774
chr1	191151324	191151571	4.1672e-05	0.110218	22	0.13473	0.024507
chr1	193067344	193067431	0.014058	-0.132549	5	0.056899	0.18945
chr1	193655904	193656038	0.036346	0.127793	6	0.15333	0.025541
chr1	193861880	193862149	0.018237	0.110905	9	0.13512	0.024217
chr1	194578465	194578632	0.0094519	0.110342	7	0.13161	0.021263
chr1	196146517	196146729	0.0070067	-0.16552	9	0.034197	0.19972
chr1	197405648	197405874	0.0085521	0.122597	15	0.16293	0.040331
chr1	199427288	199427465	0.0078229	0.155635	6	0.21051	0.054877
chr1	199632913	199633192	0.0093585	0.123102	7	0.16905	0.04595
chr1	201121364	201121543	0.031519	0.119525	5	0.14554	0.026012
chr1	201396856	201397365	0.019212	-0.108897	11	0.056561	0.16546
chr1	201556829	201557372	0.0174	-0.133936	6	0.032851	0.16679
chr1	201714189	201714383	0.025335	-0.222602	6	0.047499	0.2701
chr1	202123106	202123230	0.031519	-0.124179	5	0.028087	0.15227
chr1	202543522	202543629	0.0198	-0.12995	5	0.035	0.16495
chr1	202721426	202721503	0.031519	0.178169	5	0.21636	0.038192
chr1	202927749	202927896	0.0061321	-0.123074	7	0.031136	0.15421
chr1	203273807	203274102	0.045801	-0.124398	9	0.071485	0.19588
chr1	203454993	203455144	0.0174	-0.120941	6	0.039553	0.16049
chr1	203631851	203631954	0.046731	-0.158548	5	0.064817	0.22337
chr1	204072419	204072558	0.00099298	-0.131726	13	0.0548	0.18653
chr1	204286896	204287187	0.0078126	-0.103133	6	0.01636	0.11949
chr1	204357550	204357822	0.045815	-0.130331	11	0.048303	0.17863
chr1	204698342	204698494	0.00486	0.168711	8	0.19923	0.030519
chr1	205320388	205320571	0.00045043	-0.126312	16	0.067972	0.19428
chr1	205359855	205360424	0.0087459	-0.110521	11	0.02239	0.13291
chr1	205600012	205600739	0.037631	-0.102018	7	0.027377	0.12939
chr1	205980157	205980363	0.046731	-0.121177	5	0.034233	0.15541
chr1	206405343	206405583	0.00486	-0.112521	6	0.044665	0.15719
chr1	206469610	206470034	0.046731	-0.132526	5	0.038586	0.17111
chr1	206793444	206793546	0.00077406	0.106425	8	0.14405	0.037629
chr1	207205090	207205310	0.030518	-0.108566	10	0.025724	0.13429
chr1	207482486	207483117	0.021092	0.119694	10	0.16462	0.044926
chr1	207496454	207496527	0.00047256	0.108965	13	0.12943	0.020466
chr1	208233919	208234462	0.046731	-0.142855	5	0.081816	0.22467
chr1	208925777	208926549	0.036346	0.101239	8	0.13781	0.036568
chr1	208964818	208964911	0.014058	0.129107	5	0.15532	0.026216
chr1	209768502	209768728	0.046731	-0.111954	6	0.032267	0.14422
chr1	209827467	209827737	0.008618	-0.154011	11	0.055413	0.20942
chr1	210978100	210978163	0.031519	0.155837	5	0.19582	0.039987
chr1	211228398	211228469	0.046731	0.101733	5	0.15785	0.056117
chr1	211240610	211240774	0.037318	-0.14202	7	0.040965	0.18299
chr1	212088375	212089034	0.033746	-0.114898	11	0.094072	0.20897
chr1	212283630	212284208	0.013977	-0.11348	12	0.042092	0.15557
chr1	212365460	212365555	0.0077679	-0.177597	6	0.035439	0.21304
chr1	212452426	212452699	0.014058	-0.148261	5	0.035638	0.1839
chr1	213423836	213423918	0.006172	-0.132209	7	0.025762	0.15797
chr1	213621217	213621527	0.046731	-0.101202	6	0.030292	0.13149
chr1	214549635	214550483	0.036346	-0.13235	12	0.061483	0.19383
chr1	217135552	217135681	0.020731	0.107928	16	0.12354	0.015616
chr1	217919854	217920302	0.02771	-0.101492	12	0.037046	0.13854
chr1	218365117	218365854	0.019626	-0.118511	11	0.067189	0.1857
chr1	218463485	218463806	0.046731	-0.123703	6	0.038028	0.16173
chr1	220732858	220732969	0.0174	-0.195595	6	0.041934	0.23753
chr1	221860913	221861014	0.037059	0.106437	7	0.14073	0.034292
chr1	222700552	222700749	0.001076	-0.12215	12	0.021716	0.14387
chr1	222893354	222893642	0.0078783	-0.176824	12	0.058886	0.23571
chr1	223142259	223142469	0.038977	-0.10122	10	0.054431	0.15565
chr1	223401237	223401522	0.00016565	0.110687	20	0.14392	0.033234
chr1	224079977	224080057	0.0198	0.101999	5	0.1136	0.011601
chr1	224198366	224199035	0.024827	-0.115115	14	0.050407	0.16552
chr1	224272799	224272861	0.036346	0.113046	8	0.16508	0.052031
chr1	225362367	225362499	0.046731	0.106689	7	0.14631	0.039625
chr1	226079370	226079456	0.018875	0.172104	8	0.21853	0.046423
chr1	226100548	226101218	0.046731	0.106229	14	0.15297	0.046739
chr1	226115701	226115886	3.7885e-05	-0.14265	14	0.038591	0.18124
chr1	226128314	226128475	0.0041438	-0.154954	7	0.033577	0.18853
chr1	226198074	226198350	0.012133	0.130801	6	0.17215	0.041353
chr1	226567153	226568037	0.0048185	-0.101639	19	0.039261	0.1409
chr1	226634711	226634950	0.014058	-0.132688	12	0.060357	0.19305
chr1	226658622	226658673	0.031519	-0.134348	5	0.04452	0.17887
chr1	226941108	226941361	0.046731	-0.119728	5	0.058311	0.17804
chr1	228277650	228277700	0.046731	-0.108089	6	0.035187	0.14328
chr1	228384520	228384591	0.046731	0.143577	7	0.21279	0.069209
chr1	228464253	228464381	2.9729e-05	0.104573	18	0.14547	0.040896
chr1	228637542	228637823	1.6895e-06	0.115404	19	0.14773	0.032326
chr1	228837693	228838955	0.00015926	-0.125055	16	0.034925	0.15998
chr1	228855773	228855950	0.046594	0.100571	9	0.14388	0.043304
chr1	229062358	229062529	0.031519	-0.164738	5	0.038955	0.20369
chr1	229404724	229404877	0.012133	0.186734	6	0.21638	0.029643
chr1	229559517	229559863	0.0073216	-0.113654	17	0.051905	0.16556
chr1	230274415	230274669	0.0010653	-0.125983	12	0.040254	0.16624
chr1	230779032	230779097	0.0050754	0.148423	5	0.18908	0.04066
chr1	231187618	231187777	0.036346	-0.124952	8	0.048057	0.17301
chr1	231924845	231924951	0.00486	-0.147616	6	0.017621	0.16524
chr1	232385399	232385610	0.014058	-0.129274	7	0.026306	0.15558
chr1	232548681	232548868	0.0078027	-0.136249	6	0.032057	0.16831
chr1	234281755	234282217	0.040085	-0.103638	14	0.042996	0.14663
chr1	234501185	234501433	0.025324	-0.144544	6	0.10703	0.25158
chr1	234720469	234720726	0.0030503	-0.122545	6	0.034514	0.15706
chr1	234866234	234866740	2.4509e-05	-0.146921	13	0.054853	0.20177
chr1	234971224	234971840	0.048395	-0.108034	9	0.03933	0.14736
chr1	234979498	234980036	0.048476	-0.134855	9	0.065934	0.20079
chr1	235011655	235011969	0.0022145	-0.148561	10	0.044445	0.19301
chr1	235011996	235012626	0.00046157	-0.110578	16	0.043266	0.15384
chr1	235048093	235048316	0.046731	-0.11048	6	0.044043	0.15452
chr1	235054598	235054763	0.046731	0.126828	6	0.20959	0.082766
chr1	235330136	235330311	0.049109	-0.116084	12	0.05733	0.17341
chr1	235368124	235368323	0.014673	-0.167965	8	0.039686	0.20765
chr1	235650408	235650632	2.7704e-08	0.111493	29	0.1281	0.016604
chr1	236332616	236332682	0.014058	-0.105303	5	0.03124	0.13654
chr1	236472275	236472486	0.036346	-0.116123	6	0.078307	0.19443
chr1	236484663	236484836	0.0198	-0.116759	5	0.031416	0.14817
chr1	236685734	236686173	0.00021047	-0.102536	12	0.021224	0.12376
chr1	236751460	236751520	0.0174	0.109166	6	0.15101	0.041848
chr1	236787151	236787559	0.046731	0.113502	5	0.13477	0.021272
chr1	237344041	237344146	0.046731	0.142854	6	0.18314	0.040281
chr1	237670148	237670226	0.036309	0.100153	8	0.1379	0.037749
chr1	239387132	239387196	0.0016544	0.127814	11	0.14133	0.013517
chr1	240092076	240092391	0.00077398	0.107031	17	0.13536	0.028327
chr1	240241890	240242312	0.00021339	0.108216	23	0.1482	0.039985
chr1	240722396	240722637	0.0038355	0.115301	13	0.15991	0.044607
chr1	240748656	240748715	0.046731	-0.104141	5	0.053786	0.15793
chr1	241272078	241272150	0.0198	0.111496	5	0.14689	0.035396
chr1	242051484	242051551	0.036346	0.15425	6	0.20658	0.052327
chr1	242663688	242663975	0.031519	0.11656	5	0.15503	0.038466
chr1	245091772	245092302	0.011906	-0.114025	11	0.0457	0.15972
chr1	245131668	245131753	0.0030503	0.129158	5	0.15639	0.027236
chr1	245687839	245687917	0.0070561	-0.172795	8	0.029855	0.20265
chr1	245804363	245804552	0.046731	0.109164	7	0.15126	0.042098
chr1	245938007	245938240	0.0077946	-0.140844	6	0.039003	0.17985
chr1	246580697	246581022	0.033541	-0.103649	9	0.041895	0.14554
chr1	247415721	247416306	0.011961	-0.104837	13	0.043957	0.14879
chr1	247639617	247639767	0.0094512	0.103555	21	0.1581	0.054543
chr1	247928581	247929325	0.014621	0.100559	20	0.16615	0.065593
chr1	248067790	248067858	0.0031883	0.11646	8	0.14791	0.031453
chr10	486339	486749	0.00074963	-0.127274	11	0.049718	0.17699
chr10	611799	612033	0.025239	-0.101095	6	0.032801	0.1339
chr10	738418	738770	0.0174	0.107277	14	0.14694	0.039663
chr10	787272	787383	0.046731	0.118462	6	0.15855	0.040089
chr10	804866	805022	0.0174	-0.102591	10	0.042602	0.14519
chr10	1362885	1363300	0.046731	-0.114428	19	0.064101	0.17853
chr10	1847936	1848073	0.0174	0.16369	6	0.20074	0.037047
chr10	2168236	2168288	0.046731	0.119149	5	0.14082	0.021666
chr10	2540253	2540553	0.0078014	0.114472	12	0.17223	0.057756
chr10	2595405	2595658	0.024697	0.111321	9	0.13583	0.024513
chr10	2818414	2818628	0.0198	-0.148216	5	0.035014	0.18323
chr10	2981187	2981349	0.046731	-0.118837	5	0.026811	0.14565
chr10	3293430	3293870	0.0070427	-0.129892	9	0.044623	0.17451
chr10	3494264	3494365	0.026751	0.102021	7	0.14398	0.04196
chr10	3588228	3588937	0.018904	0.101748	8	0.13135	0.029601
chr10	3636361	3636471	0.0093447	-0.144046	7	0.01508	0.15913
chr10	3805993	3806740	0.044773	-0.118616	11	0.064193	0.18281
chr10	4035174	4035443	0.0034288	-0.112291	10	0.046243	0.15853
chr10	5021833	5022442	0.018745	-0.121146	7	0.058738	0.17988
chr10	5291560	5291801	0.018319	-0.150605	7	0.034864	0.18547
chr10	5462174	5462694	0.030476	-0.122178	10	0.063822	0.186
chr10	5595459	5596323	0.00030986	-0.106465	13	0.041533	0.148
chr10	5775829	5775971	0.047059	-0.156144	9	0.074792	0.23094
chr10	5975623	5975849	0.00030986	-0.173183	11	0.069215	0.2424
chr10	6049873	6050592	0.029586	-0.125208	10	0.068131	0.19334
chr10	6120097	6120812	0.0008625	-0.100833	23	0.056298	0.15713
chr10	6662813	6662914	0.024987	0.124733	6	0.15746	0.03273
chr10	7314855	7315161	0.0050754	-0.131426	5	0.0058824	0.13731
chr10	7400279	7400518	0.046731	-0.102682	5	0.020423	0.12311
chr10	7407514	7407620	0.0048293	-0.123622	11	0.051975	0.1756
chr10	7408264	7408354	0.00013077	0.104573	11	0.11912	0.014547
chr10	7590420	7590544	0.046731	-0.117339	5	0.058331	0.17567
chr10	8055027	8055220	0.00011641	0.107331	24	0.13572	0.028392
chr10	8055816	8055885	0.037636	-0.104565	7	0.036786	0.14135
chr10	8259187	8259329	0.025337	0.10438	6	0.14274	0.038365
chr10	8351598	8351699	0.046731	0.143707	5	0.2045	0.060792
chr10	8482946	8483097	0.046731	-0.134574	5	0.048209	0.18278
chr10	9108818	9109033	0.036346	0.129185	6	0.15569	0.026505
chr10	10366586	10366672	0.014058	0.140816	5	0.16952	0.028708
chr10	10493758	10494181	0.014316	-0.10314	8	0.01866	0.1218
chr10	10663140	10663540	0.014058	-0.141671	5	0.044584	0.18626
chr10	11180422	11180641	0.00236	-0.125808	9	0.033998	0.15981
chr10	11191510	11191837	0.036346	-0.129854	6	0.039988	0.16984
chr10	11379071	11379326	0.036346	-0.102823	6	0.025247	0.12807
chr10	11759661	11760212	0.0198	-0.101188	5	0.036028	0.13722
chr10	11880501	11880683	0.00486	0.119489	10	0.15642	0.036927
chr10	13107659	13107808	0.00028865	-0.149619	7	0.028217	0.17784
chr10	13265688	13265797	0.010099	0.105973	8	0.16653	0.060552
chr10	13346319	13346583	0.0017299	-0.114765	14	0.047493	0.16226
chr10	13658441	13659108	0.003416	-0.107103	17	0.047094	0.1542
chr10	13839459	13839844	0.0048293	-0.136426	8	0.04735	0.18378
chr10	13887700	13888205	0.0174	-0.140827	6	0.038397	0.17922
chr10	13958314	13958384	0.046671	0.113131	9	0.14663	0.033501
chr10	14022854	14023268	0.0070399	-0.122048	9	0.0636	0.18565
chr10	14032458	14032648	0.025239	-0.12416	9	0.036607	0.16077
chr10	14388468	14388669	0.046731	0.135898	5	0.15302	0.017123
chr10	14984003	14984150	0.018623	0.125429	7	0.16598	0.040553
chr10	15305883	15306044	0.036346	0.131895	6	0.17322	0.041329
chr10	16158949	16159356	0.046731	-0.107812	6	0.035863	0.14367
chr10	16864752	16865259	0.036346	0.101337	8	0.14538	0.044047
chr10	18182649	18182776	0.046731	0.120066	5	0.13697	0.016903
chr10	18401608	18402011	0.025212	0.109414	9	0.16073	0.051311
chr10	21175020	21175227	0.0086302	-0.110723	5	0.036468	0.14719
chr10	21500486	21500658	3.0164e-07	-0.140762	16	0.027528	0.16829
chr10	22253565	22253722	0.00030986	-0.136248	11	0.024814	0.16106
chr10	23191854	23192143	1.6939e-15	0.127481	43	0.1467	0.019216
chr10	23192870	23193023	1.1559e-12	0.111452	29	0.12608	0.014632
chr10	23601605	23602323	0.048528	0.100845	17	0.14549	0.044645
chr10	24465421	24465711	0.014058	-0.100782	7	0.034518	0.1353
chr10	26553416	26554052	0.019747	0.103241	11	0.16459	0.061346
chr10	26829081	26829180	0.046731	0.127502	7	0.15496	0.027454
chr10	26946652	26946823	0.013288	-0.115288	10	0.024763	0.14005
chr10	27741253	27741354	0.014283	-0.101715	9	0.040073	0.14179
chr10	28502514	28502820	0.0174	-0.103536	12	0.084173	0.18771
chr10	29311833	29311907	0.031519	0.124518	5	0.16042	0.035902
chr10	29630631	29630881	0.0198	-0.152056	10	0.061167	0.21322
chr10	29644117	29644883	0.046731	-0.110968	12	0.034378	0.14535
chr10	29874692	29874899	0.046731	-0.133595	5	0.019161	0.15276
chr10	30027726	30027952	0.010384	-0.121905	12	0.042122	0.16403
chr10	30081627	30081785	0.00486	0.134113	6	0.17454	0.040429
chr10	30431743	30432054	0.0022552	-0.100964	16	0.069974	0.17094
chr10	31257144	31257273	0.018505	0.129272	7	0.17717	0.047901
chr10	31678070	31678229	0.025239	-0.125317	6	0.034313	0.15963
chr10	31706098	31706448	0.014058	-0.137046	5	0.047225	0.18427
chr10	32143409	32143895	0.018255	-0.103972	9	0.054245	0.15822
chr10	32937327	32937480	0.046731	-0.118914	6	0.038851	0.15776
chr10	33965927	33966710	0.014058	-0.105863	7	0.059835	0.1657
chr10	34192135	34192815	0.046731	-0.127284	7	0.036503	0.16379
chr10	34538603	34538888	0.03336	-0.116506	9	0.031441	0.14795
chr10	35131936	35132073	0.0031217	-0.133207	8	0.047866	0.18107
chr10	35473884	35473988	0.00046204	0.138596	10	0.17717	0.038577
chr10	35606137	35606336	0.0088441	-0.108098	11	0.033333	0.14143
chr10	35765315	35765450	0.012095	-0.11667	11	0.028503	0.14517
chr10	36444182	36444284	0.046731	0.122222	7	0.15482	0.032597
chr10	36863449	36863674	0.012095	0.132866	11	0.16111	0.028247
chr10	38401786	38402147	0.010308	-0.128425	15	0.061814	0.19024
chr10	42952292	42952500	0.0086302	-0.141823	5	0.016348	0.15817
chr10	43396626	43396753	6.3698e-06	0.110988	18	0.11482	0.0038284
chr10	43397140	43397693	3.6877e-14	0.102135	47	0.1084	0.0062632
chr10	43454991	43455169	0.00048949	-0.136357	12	0.05054	0.1869
chr10	43543988	43544188	0.010099	0.10432	9	0.12784	0.023518
chr10	43574033	43574100	0.046731	0.129966	5	0.17038	0.040416
chr10	44343010	44343279	0.0063678	-0.162348	7	0.055198	0.21755
chr10	44386158	44386277	0.014058	-0.156245	7	0.044694	0.20094
chr10	44723629	44723905	0.046731	-0.223102	5	0.046853	0.26996
chr10	44779628	44779902	0.02489	-0.105136	6	0.024038	0.12917
chr10	44975753	44976051	0.0013244	-0.152902	8	0.038401	0.1913
chr10	45503264	45503364	0.0017299	0.128303	5	0.14952	0.02122
chr10	45673192	45673799	0.0174	-0.108216	15	0.082262	0.19048
chr10	46673915	46674090	0.0198	0.180001	5	0.22932	0.049321
chr10	47300332	47300434	0.00020472	0.10023	17	0.1108	0.010574
chr10	47300478	47300605	7.391e-07	0.147552	19	0.16359	0.016038
chr10	47361398	47361511	0.0198	-0.119904	5	0.033424	0.15333
chr10	47403291	47403629	0.025327	-0.124623	6	0.03155	0.15617
chr10	47987904	47988052	0.0198	-0.154162	5	0.025428	0.17959
chr10	48623917	48624160	0.0198	-0.129764	5	0.015515	0.14528
chr10	48684881	48685595	0.00088004	-0.114918	22	0.052186	0.1671
chr10	48970105	48970313	0.002254	0.110473	12	0.15828	0.047806
chr10	49115985	49116136	0.0086302	-0.153898	5	0.018364	0.17226
chr10	49230123	49230419	0.046731	-0.141349	7	0.031349	0.1727
chr10	49609859	49609909	0.0078014	0.104463	6	0.12669	0.022224
chr10	49768930	49769012	0.0069572	0.108743	13	0.13492	0.02618
chr10	51409377	51409584	0.026809	0.126709	7	0.16125	0.034544
chr10	51861824	51862388	0.046731	-0.104452	6	0.049102	0.15355
chr10	52885070	52885146	0.037522	0.132394	7	0.16606	0.033666
chr10	55210720	55210921	0.019496	0.141117	11	0.22175	0.080633
chr10	57479954	57480023	0.036346	0.113149	6	0.13781	0.024665
chr10	58148652	58148949	0.01733	-0.106073	14	0.01204	0.11811
chr10	58579433	58579523	0.0174	0.145368	6	0.18996	0.044591
chr10	58707773	58707858	0.046731	0.128184	5	0.18349	0.055303
chr10	59765099	59765211	0.018241	0.14127	7	0.17205	0.030782
chr10	61190596	61190703	0.018092	-0.128066	9	0.050595	0.17866
chr10	61312801	61313029	0.018451	0.114638	7	0.1681	0.053466
chr10	61867961	61868187	0.0017515	-0.120754	14	0.041793	0.16255
chr10	61991899	61992084	0.036346	-0.120963	6	0.05756	0.17852
chr10	62075564	62075785	0.00018559	-0.175664	7	0.040984	0.21665
chr10	63132855	63133020	0.0198	-0.229572	5	0.068835	0.29841
chr10	63428873	63429105	0.0174	-0.122015	6	0.044206	0.16622
chr10	63520439	63520952	6.999e-05	-0.171258	10	0.047691	0.21895
chr10	65732361	65732528	0.046731	0.137192	5	0.16824	0.031047
chr10	66024309	66024368	0.046731	0.119545	5	0.15555	0.036006
chr10	67141413	67141493	0.0198	-0.121959	5	0.010307	0.13227
chr10	67731628	67731718	0.0198	0.162003	5	0.17052	0.0085139
chr10	68526065	68526522	3.8352e-05	-0.119586	14	0.042087	0.16167
chr10	69895852	69896218	0.026605	-0.145165	8	0.024944	0.17011
chr10	69935721	69935799	0.0086302	-0.125608	5	0.037606	0.16321
chr10	70165046	70165137	0.024358	0.10983	9	0.16195	0.052122
chr10	70378646	70378720	0.014058	-0.146067	5	0.04113	0.1872
chr10	70513635	70514053	0.031099	-0.112031	10	0.051675	0.16371
chr10	70578268	70578906	0.0034109	-0.129531	9	0.027774	0.1573
chr10	71256384	71256605	0.0094519	-0.151328	7	0.086394	0.23772
chr10	71712071	71712774	0.0017685	-0.123867	14	0.063906	0.18777
chr10	71727034	71727600	0.046731	-0.124669	13	0.092317	0.21699
chr10	71728863	71729327	0.046731	-0.147	10	0.092633	0.23963
chr10	71729990	71730136	0.0034468	-0.104979	10	0.055263	0.16024
chr10	71851606	71851703	0.00046792	-0.229383	5	0.0064583	0.23584
chr10	72088436	72088533	0.014585	0.119419	8	0.14361	0.024186
chr10	72252473	72253261	0.046731	-0.109296	12	0.057873	0.16717
chr10	72298422	72298828	0.015938	-0.118585	11	0.048471	0.16706
chr10	72320412	72320969	0.017717	-0.108692	8	0.021098	0.12979
chr10	72322493	72322912	0.0078229	-0.17731	6	0.096943	0.27425
chr10	72323888	72324044	0.046731	-0.139904	8	0.081776	0.22168
chr10	72324449	72325191	0.00023642	-0.130661	16	0.06955	0.20021
chr10	72330758	72330950	0.030849	-0.102767	10	0.048718	0.15149
chr10	73412409	73412731	0.00048401	-0.144256	12	0.041502	0.18576
chr10	73645884	73646059	0.014251	0.10176	9	0.14631	0.044551
chr10	73893164	73893702	0.046526	-0.106535	9	0.057361	0.1639
chr10	73910340	73910690	0.0072909	-0.125421	9	0.030077	0.1555
chr10	73919742	73919902	0.046731	-0.151963	5	0.052074	0.20404
chr10	74017085	74017140	0.046731	-0.124709	5	0.051875	0.17658
chr10	74779919	74780132	0.020548	-0.120175	9	0.03153	0.1517
chr10	75187771	75187848	0.0086302	-0.197943	5	0.025732	0.22368
chr10	75187892	75187946	0.018774	-0.132282	7	0.023928	0.15621
chr10	75399744	75399796	0.036346	-0.110593	6	0.041551	0.15214
chr10	75431983	75432306	0.018745	-0.129287	7	0.037891	0.16718
chr10	75646393	75646900	0.040358	-0.102689	15	0.048087	0.15078
chr10	76113775	76114011	0.046731	-0.132182	7	0.026266	0.15845
chr10	76208871	76209044	0.0198	0.100769	5	0.13584	0.035069
chr10	76333616	76334063	0.046731	-0.138714	7	0.041452	0.18017
chr10	76405814	76406219	0.025239	-0.192711	6	0.041043	0.23375
chr10	77295518	77295673	0.016535	0.150895	11	0.19222	0.041328
chr10	78088604	78088874	1.2108e-09	-0.134034	21	0.024874	0.15891
chr10	78370966	78371784	0.032102	-0.104422	14	0.059715	0.16414
chr10	78913722	78913877	0.037957	-0.108974	13	0.033294	0.14227
chr10	78961990	78962465	0.031519	-0.128605	5	0.030746	0.15935
chr10	78963543	78963817	5.8165e-05	-0.176378	8	0.055423	0.2318
chr10	78974853	78975429	0.0063363	-0.127244	11	0.056464	0.18371
chr10	79025638	79025762	0.014058	-0.143331	7	0.040236	0.18357
chr10	79052367	79052434	0.014058	-0.130968	5	0.018035	0.149
chr10	79080374	79080555	0.025239	-0.150944	6	0.12849	0.27944
chr10	79087844	79088530	0.00013787	-0.104736	13	0.046968	0.1517
chr10	79089232	79089487	0.0018266	-0.117281	6	0.025904	0.14319
chr10	79126865	79127424	0.046731	-0.102321	11	0.068004	0.17033
chr10	79239341	79239499	0.037631	-0.156931	7	0.054084	0.21102
chr10	79244441	79244608	0.0018098	-0.162906	6	0.023014	0.18592
chr10	79245248	79245436	0.046731	-0.153514	5	0.047464	0.20098
chr10	79249557	79249877	0.0026795	-0.145865	7	0.036138	0.182
chr10	79261072	79261249	0.046731	-0.106445	11	0.083011	0.18946
chr10	79264972	79265181	0.01825	-0.114161	9	0.068935	0.1831
chr10	79266343	79266623	0.0094239	-0.170622	7	0.05915	0.22977
chr10	79296741	79296812	0.0050754	-0.114626	5	0.016552	0.13118
chr10	79340789	79340925	0.00093429	-0.112737	5	0.01462	0.12736
chr10	79412859	79413445	0.0072909	-0.132895	9	0.03318	0.16608
chr10	80135949	80136151	0.0086302	-0.133099	5	0.03709	0.17019
chr10	80207026	80207386	2.7683e-10	-0.123275	26	0.029534	0.15281
chr10	80399374	80399512	0.035098	-0.124776	6	0.016222	0.141
chr10	80413778	80414167	0.020619	-0.1141	10	0.05642	0.17052
chr10	80453458	80453587	0.046731	-0.151068	6	0.040249	0.19132
chr10	80460748	80461175	0.046731	-0.136399	5	0.048896	0.1853
chr10	80500769	80501101	0.0048293	-0.103324	8	0.046921	0.15025
chr10	80596809	80596935	0.036346	-0.168866	6	0.015064	0.18393
chr10	81773008	81773187	0.0056477	0.101631	14	0.12561	0.023984
chr10	81874466	81874539	0.03911	0.103029	10	0.13177	0.028741
chr10	81874789	81875006	6.7402e-16	0.140232	35	0.1724	0.032171
chr10	81923267	81923354	0.0020947	0.116356	8	0.13761	0.021251
chr10	81987147	81987245	0.046731	0.121053	6	0.17267	0.05162
chr10	82534336	82534388	0.0050754	0.172365	5	0.19534	0.022976
chr10	84347775	84347901	0.046731	0.117736	10	0.1588	0.041063
chr10	84391702	84391970	0.031519	-0.116145	5	0.054491	0.17064
chr10	84571412	84571559	0.0096239	0.12548	10	0.16481	0.039332
chr10	85609433	85609786	0.0086302	-0.124949	5	0.029824	0.15477
chr10	86354329	86354525	0.00062371	0.160216	9	0.18888	0.028666
chr10	86971844	86972458	0.0012866	-0.144941	19	0.065287	0.21023
chr10	87934706	87934814	0.031519	-0.135067	5	0.037794	0.17286
chr10	89380549	89380650	0.036346	0.111673	6	0.13926	0.027582
chr10	89410757	89411108	0.046731	-0.168218	5	0.05717	0.22539
chr10	91153309	91153366	0.046731	0.103499	5	0.13457	0.031068
chr10	91903056	91903369	0.046731	0.105435	14	0.15155	0.046116
chr10	92689969	92690135	1.602e-08	0.113125	28	0.13798	0.02486
chr10	92695912	92696160	1.1704e-11	-0.140996	26	0.027507	0.1685
chr10	93062860	93062971	0.00044802	0.110612	13	0.13825	0.027633
chr10	93483263	93483430	0.0062503	-0.179677	7	0.0709	0.25058
chr10	93840473	93840640	0.026543	0.102632	8	0.14401	0.04138
chr10	96384646	96384707	0.026802	0.113844	7	0.17401	0.060164
chr10	96751405	96751817	0.040425	0.117297	14	0.14774	0.030441
chr10	97149204	97149463	0.01365	-0.103223	14	0.049541	0.15276
chr10	97170007	97170129	0.012115	0.126552	6	0.15466	0.028107
chr10	97318179	97318431	0.0174	-0.107119	12	0.059781	0.1669
chr10	97561075	97561169	0.0174	-0.152403	6	0.05733	0.20973
chr10	97689531	97690009	0.036346	-0.121002	6	0.042546	0.16355
chr10	97975259	97975317	0.0174	-0.114031	6	0.027097	0.14113
chr10	98371578	98371700	0.0030503	-0.107053	6	0.024233	0.13129
chr10	98541429	98542001	0.0057308	-0.115475	14	0.032835	0.14831
chr10	98788764	98788950	0.0070819	0.10442	8	0.13791	0.033492
chr10	99054721	99054813	0.0198	0.21519	5	0.25255	0.037358
chr10	99329873	99329927	0.0023705	0.125321	11	0.1504	0.025077
chr10	100005581	100005702	0.025323	-0.137965	6	0.046128	0.18409
chr10	100403094	100403437	0.0023821	-0.124211	10	0.057563	0.18177
chr10	100655555	100655680	0.0009779	0.133455	9	0.16912	0.03567
chr10	100812348	100812849	0.014664	-0.107214	8	0.029726	0.13694
chr10	101070678	101070969	0.046731	0.101997	7	0.15284	0.050847
chr10	102137055	102137199	0.018991	-0.130897	8	0.054389	0.18529
chr10	102800277	102801537	0.0078014	-0.111409	20	0.075317	0.18673
chr10	103189559	103189731	0.0198	-0.149563	5	0.069976	0.21954
chr10	103277105	103277199	0.0045339	0.121275	14	0.14495	0.023673
chr10	103350308	103350395	0.036346	-0.142548	6	0.058198	0.20075
chr10	103621980	103622419	0.014058	-0.119389	7	0.038045	0.15743
chr10	103656594	103656888	0.036346	-0.143932	6	0.052182	0.19611
chr10	103661187	103661488	0.048941	0.109729	12	0.1906	0.080873
chr10	103968989	103969118	0.0099219	-0.137066	9	0.045141	0.18221
chr10	104267828	104267934	0.0063673	-0.178825	7	0.070652	0.24948
chr10	104325725	104325792	0.036346	-0.124879	6	0.091552	0.21643
chr10	104327782	104328272	0.00046718	-0.103904	11	0.053872	0.15778
chr10	104641381	104641467	0.001272	0.101045	14	0.12701	0.025965
chr10	105915443	105915754	0.036346	0.14343	6	0.15781	0.014385
chr10	106234670	106234769	0.00486	0.12092	8	0.15429	0.033369
chr10	106390068	106390266	0.022141	0.134278	10	0.18228	0.048006
chr10	106939779	106940025	0.046731	0.112247	5	0.14479	0.032541
chr10	107039155	107039252	0.014058	0.152897	8	0.19334	0.040447
chr10	107544258	107544328	0.046731	0.128232	6	0.17038	0.04215
chr10	107726715	107726925	0.0174	0.124932	6	0.15426	0.029332
chr10	107938121	107938178	0.031519	-0.102518	5	0.010238	0.11276
chr10	107950587	107950686	0.00486	0.122614	10	0.17049	0.047881
chr10	109493471	109493718	0.021182	0.112539	10	0.16845	0.055908
chr10	109533513	109533615	0.0021801	0.151933	10	0.19742	0.04549
chr10	109700251	109700433	0.00099939	0.119175	13	0.14801	0.028831
chr10	110029097	110029283	0.046731	-0.138008	7	0.039002	0.17701
chr10	110364318	110364676	0.012494	-0.123131	10	0.021279	0.14441
chr10	110393095	110393478	0.038262	-0.102287	10	0.034632	0.13692
chr10	111259151	111259647	0.046731	0.102762	7	0.14329	0.040526
chr10	111308100	111308227	0.0198	-0.115739	5	0.015805	0.13154
chr10	112346779	112347721	0.038617	0.109956	10	0.14609	0.036138
chr10	112376373	112376690	0.00013696	-0.11513	12	0.047318	0.16245
chr10	112992067	112992373	0.00048401	-0.140376	12	0.029474	0.16985
chr10	113061542	113061712	0.031519	-0.128706	5	0.031565	0.16027
chr10	113084659	113084790	0.046731	-0.134666	5	0.039658	0.17432
chr10	113087309	113087672	0.0077232	-0.139179	6	0.047829	0.18701
chr10	113666039	113666418	0.046731	-0.1175	5	0.060801	0.1783
chr10	114181580	114181705	0.018989	0.123199	8	0.1879	0.064699
chr10	114285442	114285894	0.046731	0.111597	9	0.15671	0.045112
chr10	114547626	114547762	0.0483	-0.106319	9	0.043958	0.15028
chr10	114571270	114571487	0.0065318	-0.10658	11	0.032864	0.13944
chr10	116271832	116271917	0.0042578	0.133338	7	0.15459	0.021249
chr10	116392037	116392189	0.048713	0.107344	9	0.13954	0.032201
chr10	117140092	117140163	0.0023821	0.112281	11	0.14428	0.031997
chr10	117217722	117217813	0.036346	-0.101395	6	0.037886	0.13928
chr10	117373473	117373532	0.012115	-0.187955	6	0.047491	0.23545
chr10	117534664	117534886	9.7281e-05	0.111635	25	0.16583	0.054195
chr10	117537149	117537211	0.0174	-0.112646	6	0.017437	0.13008
chr10	117578244	117578515	0.031519	-0.104854	5	0.036155	0.14101
chr10	117762212	117762321	0.018654	0.123707	8	0.17321	0.049503
chr10	118047336	118047591	3.5225e-05	-0.126714	12	0.025102	0.15182
chr10	118690127	118690249	0.0023656	0.101232	11	0.12388	0.022645
chr10	118937584	118937839	0.0174	0.118654	10	0.15915	0.040497
chr10	119083468	119083710	0.046731	0.189249	5	0.24247	0.053218
chr10	119226167	119226414	0.0050754	-0.121199	5	0.032411	0.15361
chr10	119313988	119314217	0.046731	0.109779	5	0.15153	0.041747
chr10	119357920	119358093	0.0174	-0.140146	6	0.030634	0.17078
chr10	119430924	119431780	0.0035577	-0.105138	26	0.058935	0.16407
chr10	119795812	119795904	0.0013378	-0.126572	8	0.047512	0.17408
chr10	119818458	119818534	0.00030993	-0.132921	11	0.025258	0.15818
chr10	121625046	121625350	0.0031504	-0.101649	8	0.022727	0.12438
chr10	122005755	122006321	0.021926	-0.107785	10	0.046343	0.15413
chr10	122085309	122085385	0.046731	-0.109148	5	0.037515	0.14666
chr10	122147246	122147691	0.033498	-0.122309	9	0.048663	0.17097
chr10	122954663	122954785	0.046731	0.107499	12	0.17321	0.065713
chr10	123150113	123150165	0.014274	0.165684	9	0.19054	0.024856
chr10	123666231	123666363	0.0038815	0.128337	21	0.1607	0.03236
chr10	124222023	124222222	0.0023685	-0.156963	9	0.051234	0.2082
chr10	124510446	124510672	0.046731	-0.123279	7	0.025922	0.1492
chr10	124619102	124620252	2.2906e-07	-0.138693	39	0.079864	0.21856
chr10	124624645	124624717	0.046731	-0.147822	5	0.049891	0.19771
chr10	124626053	124626119	0.036894	-0.119818	7	0.052524	0.17234
chr10	124626846	124627298	0.025239	-0.115638	9	0.039909	0.15555
chr10	124640784	124641003	0.045818	-0.124586	11	0.10118	0.22576
chr10	124654203	124654838	0.0010592	-0.128159	17	0.076548	0.20471
chr10	124700355	124700442	0.046731	-0.131677	5	0.073597	0.20527
chr10	124703192	124703512	0.004837	-0.115668	8	0.020739	0.13641
chr10	124704064	124704638	0.046731	-0.117038	12	0.047577	0.16461
chr10	124708660	124709386	0.0014588	-0.124117	13	0.067823	0.19194
chr10	124710059	124710523	0.031519	-0.100585	13	0.099806	0.20039
chr10	124713959	124714116	0.0198	-0.125354	5	0.032895	0.15825
chr10	124715791	124716081	0.031519	-0.14657	5	0.029024	0.17559
chr10	124724184	124724442	0.0099689	-0.123645	8	0.073714	0.19736
chr10	124731701	124731891	0.037594	-0.100357	7	0.034848	0.1352
chr10	125023217	125023548	0.0030822	-0.104444	16	0.034872	0.13932
chr10	125062723	125062991	0.046731	-0.132345	6	0.035069	0.16741
chr10	125162267	125163057	2.6748e-10	-0.113635	44	0.062339	0.17597
chr10	125527140	125527225	0.046731	0.106258	7	0.14692	0.040665
chr10	126461477	126461752	0.026586	0.112571	8	0.15431	0.041734
chr10	127313897	127314090	0.0174	-0.136679	6	0.04331	0.17999
chr10	127358458	127358665	0.00486	-0.126378	8	0.032525	0.1589
chr10	127448458	127448567	0.046731	0.108675	8	0.14825	0.039577
chr10	127990764	127991520	0.016072	-0.100451	15	0.033775	0.13423
chr10	128286956	128287156	0.0076767	0.121054	20	0.15429	0.033238
chr10	128388859	128390143	0.021701	-0.104879	12	0.036102	0.14098
chr10	129092619	129092970	0.025324	0.1022	6	0.14474	0.042538
chr10	129139640	129140036	0.00486	0.137535	10	0.18483	0.047291
chr10	129467856	129468054	0.0050754	-0.134034	5	0.057355	0.19139
chr10	129547276	129547685	0.031519	-0.138785	5	0.040386	0.17917
chr10	129959371	129959610	1.7953e-12	0.119732	29	0.15329	0.033555
chr10	129966769	129966979	0.0093979	-0.118215	10	0.037006	0.15522
chr10	130053635	130053747	0.046731	0.102113	6	0.13227	0.030156
chr10	130556784	130556996	0.030784	0.108165	10	0.16491	0.056748
chr10	131118301	131118549	0.046731	0.104198	5	0.11779	0.013597
chr10	131124356	131124811	0.049106	0.100023	12	0.12971	0.02969
chr10	131244641	131244791	0.031519	0.119565	5	0.16434	0.044779
chr10	131350644	131350915	0.00486	0.12173	10	0.16874	0.047007
chr10	131551913	131552990	0.038913	-0.100947	13	0.059892	0.16084
chr10	131554131	131554646	0.0094512	0.101585	10	0.14249	0.040903
chr10	131643824	131643886	0.018244	0.125505	7	0.15641	0.030904
chr10	131853811	131853986	0.028303	0.128934	12	0.15984	0.030906
chr10	131928381	131928858	0.044648	-0.129794	11	0.084863	0.21466
chr10	131979937	131980142	9.9504e-05	0.101994	21	0.15023	0.048233
chr10	131982832	131983126	0.00011888	-0.107071	18	0.05988	0.16695
chr10	132205304	132205359	0.0198	0.110616	5	0.12211	0.011498
chr10	132230298	132230502	0.032041	-0.115962	18	0.031839	0.1478
chr10	132254429	132254745	0.046731	0.130126	7	0.17421	0.044079
chr10	132325781	132325922	0.0072909	-0.16919	9	0.054375	0.22356
chr10	132375168	132375495	0.00046879	-0.151816	16	0.048397	0.20021
chr10	132398560	132398691	0.046731	-0.124109	5	0.076002	0.20011
chr10	132411615	132411792	0.0010672	0.131604	12	0.17812	0.046512
chr10	132417292	132417345	0.025244	-0.101362	6	0.026195	0.12756
chr10	132447633	132448018	0.0022701	-0.105007	16	0.041651	0.14666
chr10	132449626	132449719	0.046731	-0.149326	6	0.023983	0.17331
chr10	132468087	132468169	0.046731	-0.145798	6	0.061436	0.20723
chr10	132515120	132515410	0.012115	-0.113021	11	0.06067	0.17369
chr10	132551391	132552072	0.0015396	-0.105885	18	0.06496	0.17084
chr10	132571239	132571462	0.014058	-0.181147	7	0.053962	0.23511
chr10	132788263	132788355	0.00038716	0.106812	15	0.13417	0.027355
chr10	132791873	132791993	0.014058	0.184923	7	0.24241	0.057488
chr10	132807031	132807294	0.0020874	0.101313	8	0.12722	0.025907
chr10	132861888	132862032	0.031519	0.126682	5	0.16411	0.037426
chr10	132907839	132908044	0.0057363	-0.111285	12	0.033873	0.14516
chr10	132918416	132918497	0.0016485	0.191194	7	0.25715	0.065957
chr10	132960799	132961057	0.0093846	0.101415	17	0.17083	0.069418
chr10	133063514	133063574	0.046731	0.192656	6	0.24269	0.050037
chr10	133105746	133105879	0.036346	0.112619	6	0.15943	0.046809
chr10	133198475	133198620	0.0024061	0.127188	10	0.16592	0.038728
chr10	133224863	133224929	0.0198	-0.18463	5	0.033014	0.21764
chr10	133242912	133243091	0.0035001	-0.123071	10	0.03885	0.16192
chr10	133247811	133247894	0.0094519	0.104674	7	0.14214	0.037462
chr10	133528441	133528546	4.1661e-06	0.127356	14	0.17065	0.043293
chr10_GL383546v1_alt	128668	128894	0.02363	0.154905	13	0.19683	0.041926
chr10_KI270825v1_alt	110853	111490	0.026439	-0.100151	15	0.068076	0.16823
chr11	268115	268327	0.036346	-0.111281	8	0.036263	0.14754
chr11	315750	315883	0.0019486	-0.117007	13	0.047839	0.16485
chr11	392538	392650	0.014058	0.113131	12	0.14739	0.034255
chr11	396756	396936	0.00075995	0.104736	15	0.13738	0.032647
chr11	397372	397534	0.002403	-0.140138	10	0.051225	0.19136
chr11	504561	505004	0.014058	0.121724	22	0.17036	0.048637
chr11	515170	515608	0.0174	-0.12904	6	0.048965	0.17801
chr11	518557	518622	0.046731	-0.130972	7	0.041143	0.17212
chr11	536951	537054	7.006e-05	0.135281	17	0.15717	0.021893
chr11	614422	614565	0.036346	-0.167457	6	0.082578	0.25003
chr11	692775	693754	9.2734e-07	-0.108604	39	0.056155	0.16476
chr11	696627	696854	0.022753	-0.127838	9	0.046112	0.17395
chr11	704986	705160	0.026809	-0.11469	7	0.062423	0.17711
chr11	726514	726589	0.00074963	0.224224	11	0.24784	0.023618
chr11	788278	788537	0.0019887	-0.108322	15	0.034357	0.14268
chr11	831136	831236	0.018377	-0.113074	7	0.02534	0.13841
chr11	832263	832474	0.046731	-0.104867	7	0.064695	0.16956
chr11	932448	933035	0.0174	-0.171425	10	0.056232	0.22766
chr11	1040203	1040255	0.012116	-0.157209	6	0.012633	0.16984
chr11	1183002	1183170	0.046731	0.109969	10	0.1528	0.042833
chr11	1419289	1419400	0.046731	0.153386	6	0.19149	0.038104
chr11	1456658	1456824	0.00020307	-0.151946	17	0.059399	0.21135
chr11	1487132	1487336	0.012115	-0.105044	11	0.043963	0.14901
chr11	1503897	1504294	5.8355e-05	-0.108616	14	0.044463	0.15308
chr11	1516582	1516800	0.046731	-0.106801	6	0.026369	0.13317
chr11	1746448	1746827	0.0075483	-0.124783	18	0.047893	0.17268
chr11	1771314	1771772	9.7317e-05	-0.122172	19	0.04939	0.17156
chr11	1843744	1843893	0.018697	-0.134924	7	0.044394	0.17932
chr11	1875634	1875777	0.0174	-0.1183	6	0.042247	0.16055
chr11	1878165	1878288	0.036346	-0.137491	6	0.056516	0.19401
chr11	1978878	1979323	0.0077936	-0.107154	19	0.049121	0.15628
chr11	1999872	1999989	0.00059221	-0.124565	14	0.055836	0.1804
chr11	2002045	2002252	0.011831	0.104269	18	0.16509	0.060824
chr11	2002895	2003329	0.00065531	-0.108699	18	0.037945	0.14664
chr11	2103862	2104170	0.032978	0.118166	9	0.15435	0.036184
chr11	2134565	2134810	0.046731	-0.127762	6	0.029605	0.15737
chr11	2385707	2385853	0.046731	-0.115892	8	0.056409	0.1723
chr11	2389449	2389663	0.046731	-0.117816	7	0.03673	0.15455
chr11	2529828	2529909	0.0071147	0.112643	8	0.14273	0.030084
chr11	2860773	2861005	0.0042289	-0.145815	7	0.028159	0.17397
chr11	2869834	2869924	0.01625	0.10252	11	0.13607	0.03355
chr11	2932954	2933478	0.02072	-0.106272	12	0.057969	0.16424
chr11	3058766	3058927	0.031519	-0.14164	5	0.026921	0.16856
chr11	3068733	3069030	0.0174	0.162608	10	0.20374	0.041133
chr11	3221838	3222051	0.0010765	-0.136109	10	0.028069	0.16418
chr11	3462233	3462419	0.036346	0.109899	6	0.14997	0.040071
chr11	3834278	3835240	0.038884	-0.1323	10	0.070975	0.20328
chr11	3900329	3900526	0.00030986	-0.159915	11	0.033621	0.19354
chr11	5054297	5054347	0.046731	0.129186	6	0.17795	0.048765
chr11	6391179	6391413	0.046731	-0.13752	6	0.047177	0.1847
chr11	8009523	8009658	0.036406	0.116329	12	0.19178	0.075449
chr11	8230305	8230512	0.00030993	-0.139728	11	0.056073	0.1958
chr11	8342919	8343334	0.046731	-0.117036	9	0.034956	0.15199
chr11	9363586	9364098	0.0013403	-0.146209	20	0.060274	0.20648
chr11	9456942	9457057	0.031519	0.16845	5	0.1968	0.02835
chr11	9526811	9527124	0.024233	-0.11854	13	0.042293	0.16083
chr11	10304002	10304268	0.00017128	-0.138792	10	0.049774	0.18857
chr11	10489110	10489288	0.012115	-0.171549	6	0.02923	0.20078
chr11	10606238	10606705	0.019001	-0.13092	8	0.042808	0.17373
chr11	11493458	11493882	0.046731	-0.135181	5	0.044898	0.18008
chr11	11584515	11584572	0.0086302	-0.135463	5	0.032882	0.16834
chr11	12042263	12042451	0.025149	-0.103062	6	0.019855	0.12292
chr11	12989254	12989630	0.014579	-0.110717	16	0.052742	0.16346
chr11	13073742	13073935	0.0198	-0.153088	5	0.040668	0.19376
chr11	13144878	13144945	0.0198	-0.135617	5	0.046066	0.18168
chr11	13963244	13963427	3.4932e-15	0.103847	25	0.12002	0.016173
chr11	14146212	14146429	0.0086302	0.129686	5	0.16628	0.036593
chr11	14661611	14661670	0.006208	0.155531	7	0.18532	0.029788
chr11	15060625	15060813	0.014627	0.159607	8	0.22904	0.06943
chr11	15604301	15604478	0.046731	0.145348	5	0.18479	0.03944
chr11	15968975	15969281	0.014579	-0.171721	8	0.079091	0.25081
chr11	18105297	18105410	0.036346	-0.116451	6	0.01933	0.13578
chr11	19703441	19703538	0.046731	-0.125189	5	0.023632	0.14882
chr11	22764277	22764453	0.0096704	0.102725	14	0.16828	0.06556
chr11	22829665	22829775	0.00011303	0.168502	10	0.21161	0.043112
chr11	23456361	23456411	0.0042047	0.154583	7	0.19232	0.037735
chr11	24180064	24180290	3.9038e-05	0.105885	13	0.1717	0.065813
chr11	26338917	26339396	0.018287	0.123551	9	0.15341	0.029856
chr11	26344427	26344611	0.014058	0.123291	9	0.1873	0.064009
chr11	27219860	27219952	0.026743	0.104283	7	0.13558	0.031294
chr11	27430065	27430686	0.017752	-0.141434	9	0.029178	0.17061
chr11	28378352	28378500	0.018945	0.112816	8	0.13634	0.023521
chr11	29563314	29563375	0.0174	-0.100264	6	0.0055995	0.10586
chr11	29973690	29973831	0.01469	0.105321	8	0.16076	0.055444
chr11	30512770	30512939	0.046731	0.106187	6	0.14553	0.039338
chr11	32333846	32333980	0.046731	-0.111214	14	0.023249	0.13446
chr11	33061599	33062012	0.0042481	-0.156244	7	0.056981	0.21322
chr11	33255843	33256200	3.4539e-05	-0.128854	14	0.053789	0.18264
chr11	34192496	34192671	0.036346	0.100137	6	0.12725	0.02711
chr11	34929765	34930140	0.036346	-0.112263	6	0.024791	0.13705
chr11	35144417	35144683	0.0030503	-0.160354	5	0.025449	0.1858
chr11	35180137	35180435	0.025239	-0.165014	6	0.090344	0.25536
chr11	35238245	35238366	0.0198	-0.149693	5	0.028397	0.17809
chr11	35553523	35553610	0.035653	0.135401	6	0.17176	0.036361
chr11	36431728	36432028	0.025335	-0.131065	6	0.016802	0.14787
chr11	36733781	36734018	0.046731	0.121843	7	0.14897	0.027132
chr11	38337003	38337219	0.0017549	0.121895	16	0.16181	0.039918
chr11	39217131	39217194	0.025296	0.163972	6	0.24591	0.081934
chr11	40186572	40186715	0.0174	-0.11703	6	0.021955	0.13898
chr11	40731036	40731094	0.046731	0.112146	5	0.13637	0.024224
chr11	42389318	42389808	0.014271	0.104368	9	0.13657	0.032203
chr11	43580950	43581297	4.4582e-05	0.11743	27	0.1441	0.026672
chr11	44306037	44306188	0.0098648	-0.10331	9	0.023217	0.12653
chr11	44510776	44511321	0.046731	0.100499	7	0.15424	0.053743
chr11	44597115	44597785	0.03088	-0.149274	10	0.090748	0.24002
chr11	44681018	44681306	0.046731	-0.121065	5	0.037449	0.15851
chr11	45045088	45045589	0.0070035	-0.12743	10	0.041486	0.16892
chr11	46293173	46293564	0.015767	-0.110276	13	0.039873	0.15015
chr11	46345491	46345550	0.00031534	-0.171287	6	0.022514	0.1938
chr11	46360472	46361012	0.040109	-0.100329	14	0.092145	0.19247
chr11	47193660	47194178	0.0025767	-0.133574	13	0.053146	0.18672
chr11	47216896	47217248	0.037628	-0.136928	7	0.077977	0.21491
chr11	47385409	47385752	0.018991	-0.130654	8	0.018699	0.14935
chr11	47399117	47399591	0.0042578	-0.103306	16	0.030516	0.13382
chr11	47714466	47714614	0.0174	-0.109851	6	0.034483	0.14433
chr11	48005607	48007261	0.043834	-0.110889	20	0.064424	0.17531
chr11	49433611	49433662	0.046731	0.110968	5	0.13634	0.025374
chr11	56332766	56332935	0.033498	0.100523	9	0.12112	0.0206
chr11	57200972	57202479	0.0069934	-0.100623	25	0.055554	0.15618
chr11	57262559	57262713	0.046731	0.114377	6	0.15244	0.038067
chr11	57307304	57308057	0.026263	-0.114968	11	0.077965	0.19293
chr11	57474238	57474456	0.046731	-0.114181	8	0.038295	0.15248
chr11	57751809	57752112	0.00032218	-0.168567	7	0.038564	0.20713
chr11	57903807	57904490	1.3767e-05	-0.115015	13	0.022064	0.13708
chr11	60446458	60446770	0.00486	-0.113615	10	0.022668	0.13628
chr11	60852878	60853010	8.9165e-06	-0.105126	21	0.028578	0.1337
chr11	61146134	61146939	0.0065163	-0.104227	15	0.045699	0.14993
chr11	61277774	61277920	0.046731	-0.114376	6	0.027783	0.14216
chr11	61369127	61370189	0.004837	-0.115399	11	0.035404	0.1508
chr11	61496231	61496366	0.0198	-0.15453	5	0.028479	0.18301
chr11	61532807	61533050	0.046731	-0.116922	10	0.072963	0.18988
chr11	61626261	61626943	0.014172	-0.100577	9	0.051841	0.15242
chr11	61676665	61677035	0.046731	-0.142492	6	0.027999	0.17049
chr11	61700046	61700204	0.018678	-0.123889	8	0.053034	0.17692
chr11	61701464	61701538	0.0077936	-0.132421	6	0.023271	0.15569
chr11	61709910	61710595	0.012072	-0.100338	13	0.042148	0.14249
chr11	61889947	61890060	0.031519	-0.138887	5	0.034875	0.17376
chr11	61956945	61957026	0.031519	-0.139625	5	0.046286	0.18591
chr11	62013624	62013738	0.0086302	-0.157456	5	0.024934	0.18239
chr11	62398683	62399140	0.048468	-0.1366	9	0.069776	0.20638
chr11	62410780	62411353	0.018269	-0.10711	9	0.053176	0.16029
chr11	62413234	62413477	0.001872	-0.128779	8	0.035565	0.16434
chr11	62422819	62422984	0.046731	-0.192384	5	0.075762	0.26815
chr11	62497578	62497878	0.036346	-0.152956	8	0.048221	0.20118
chr11	62635070	62635431	0.046731	-0.106384	7	0.051902	0.15829
chr11	62645306	62645613	0.046731	-0.110086	12	0.071817	0.1819
chr11	62670834	62671055	0.010464	-0.135542	12	0.071132	0.20667
chr11	62729819	62730168	0.0174	-0.120437	10	0.040359	0.1608
chr11	62753330	62753674	0.03749	-0.120143	7	0.038267	0.15841
chr11	62882391	62882780	0.010063	-0.116754	8	0.025101	0.14185
chr11	63634231	63634322	0.046731	-0.174361	7	0.056738	0.2311
chr11	63652627	63653148	0.036346	-0.109862	6	0.040045	0.14991
chr11	63763630	63764290	0.00069436	-0.124888	27	0.063641	0.18853
chr11	63770092	63770499	0.0174	-0.100114	14	0.05568	0.15579
chr11	63818167	63818286	0.01869	-0.104769	7	0.047903	0.15267
chr11	63873000	63873794	4.6014e-06	-0.167039	15	0.060331	0.22737
chr11	63998925	63999040	6.1234e-06	-0.170321	14	0.035333	0.20565
chr11	64001662	64002338	0.0028438	-0.113385	19	0.056381	0.16977
chr11	64037281	64037467	0.00030986	-0.101953	13	0.024807	0.12676
chr11	64064919	64065289	1.0301e-05	-0.135634	14	0.028911	0.16455
chr11	64207368	64207541	0.00020049	-0.152186	13	0.070116	0.2223
chr11	64209580	64209691	0.0198	-0.104701	5	0.019528	0.12423
chr11	64297461	64297559	0.00023706	-0.147575	9	0.022841	0.17042
chr11	64311359	64311484	0.025244	-0.136012	6	0.023093	0.15911
chr11	64360279	64360355	0.039299	-0.124871	10	0.076429	0.2013
chr11	64456926	64457097	0.046731	-0.108343	5	0.02174	0.13008
chr11	64741550	64741884	0.048773	-0.11321	12	0.049595	0.1628
chr11	64853307	64853479	0.031519	-0.183743	5	0.059814	0.24356
chr11	64855479	64856340	0.00050169	-0.116892	23	0.09703	0.21392
chr11	64858992	64859110	0.034443	-0.125009	6	0.049003	0.17401
chr11	64859933	64860271	0.00013091	-0.117773	21	0.031425	0.1492
chr11	64870264	64870357	0.031519	-0.128426	5	0.044319	0.17274
chr11	65165923	65166432	0.00083243	-0.12204	21	0.0334	0.15544
chr11	65183253	65183547	0.013856	-0.134208	10	0.034568	0.16878
chr11	65184253	65184327	0.0063294	-0.155345	7	0.026388	0.18173
chr11	65375075	65375219	0.046731	-0.104702	5	0.031782	0.13648
chr11	65407685	65408365	1.2755e-05	-0.103883	24	0.043944	0.14783
chr11	65522858	65523246	0.018771	-0.106549	8	0.022743	0.12929
chr11	65546529	65546680	4.2318e-10	-0.119024	17	0.010215	0.12924
chr11	65546872	65547085	0.00016371	-0.103394	16	0.034265	0.13766
chr11	65568554	65568610	0.0198	-0.111804	5	0.015474	0.12728
chr11	65592596	65592740	0.026149	-0.121448	11	0.069414	0.19086
chr11	65606758	65606983	0.037576	-0.100059	7	0.044473	0.14453
chr11	65607228	65607341	0.0022788	-0.105503	19	0.040284	0.14579
chr11	65613047	65613260	0.046731	-0.105823	11	0.078467	0.18429
chr11	65642417	65642549	0.03918	-0.105411	10	0.050598	0.15601
chr11	65647499	65647623	0.00017297	-0.125571	15	0.056784	0.18236
chr11	65650310	65650700	0.01187	-0.11871	11	0.060382	0.17909
chr11	66127260	66127587	0.02655	-0.131168	8	0.051662	0.18283
chr11	66191748	66191947	0.0042095	-0.180859	7	0.076883	0.25774
chr11	66334663	66335015	0.00030316	-0.101962	24	0.039274	0.14124
chr11	66363299	66363531	0.026203	-0.115452	11	0.058528	0.17398
chr11	66547529	66548731	0.0018667	-0.101183	21	0.041625	0.14281
chr11	66626915	66627517	0.045046	-0.121334	11	0.041183	0.16252
chr11	66857396	66857635	0.0024061	-0.177199	10	0.038292	0.21549
chr11	67032249	67032631	0.0001299	-0.128474	11	0.033531	0.16201
chr11	67049104	67049338	0.0078027	-0.101774	6	0.034043	0.13582
chr11	67057672	67057935	0.00348	-0.140105	10	0.065573	0.20568
chr11	67115246	67115646	0.047856	-0.113206	9	0.048874	0.16208
chr11	67267718	67268256	0.00023628	-0.102707	16	0.049031	0.15174
chr11	67275287	67275449	0.026268	-0.127409	8	0.062221	0.18963
chr11	67276681	67276897	0.038252	-0.108389	10	0.093168	0.20156
chr11	67310733	67310989	0.00076131	-0.12617	8	0.029614	0.15578
chr11	67311904	67313001	4.8462e-07	-0.120016	27	0.061763	0.18178
chr11	67316657	67316728	0.046731	-0.164339	6	0.0732	0.23754
chr11	67402292	67402862	0.0046779	-0.115488	19	0.060914	0.1764
chr11	67436177	67436291	0.02644	-0.105929	8	0.031714	0.13764
chr11	67498542	67498774	0.00054056	-0.101219	17	0.024551	0.12577
chr11	67584750	67584896	0.031519	-0.167093	5	0.014688	0.18178
chr11	67611489	67611568	0.00098615	-0.180894	7	0.027956	0.20885
chr11	67628918	67629149	0.00063435	-0.139488	16	0.028371	0.16786
chr11	67881530	67881653	0.046731	-0.120339	5	0.030731	0.15107
chr11	67970101	67970499	0.0032003	-0.108286	8	0.02735	0.13564
chr11	67991508	67991614	0.0010592	-0.147657	12	0.042522	0.19018
chr11	67991775	67991863	0.0174	-0.129101	10	0.026064	0.15517
chr11	68311035	68311801	0.036346	-0.102081	20	0.069952	0.17203
chr11	68321504	68321825	0.0063476	-0.141164	7	0.028052	0.16922
chr11	68336667	68337077	0.0252	-0.106576	9	0.037418	0.14399
chr11	68370119	68370401	0.0086302	-0.135016	5	0.03749	0.17251
chr11	68446448	68446823	0.001005	-0.102708	13	0.033956	0.13666
chr11	68462253	68462779	0.030808	-0.1347	10	0.04572	0.18042
chr11	68504400	68504885	0.046731	-0.113037	7	0.067834	0.18087
chr11	68549791	68550344	0.030066	-0.100746	10	0.049386	0.15013
chr11	68677223	68677759	0.0174	-0.101004	10	0.022033	0.12304
chr11	68749546	68750000	0.010447	-0.116679	12	0.050108	0.16679
chr11	68818249	68818563	0.046731	-0.142034	7	0.070302	0.21234
chr11	68827822	68828281	0.0033514	-0.121727	9	0.055639	0.17737
chr11	68844010	68844180	1.8672e-07	-0.103097	16	0.016759	0.11986
chr11	68870578	68870871	0.025324	-0.145914	6	0.036198	0.18211
chr11	68928700	68929128	0.046731	-0.109504	5	0.030489	0.13999
chr11	69034434	69034838	5.1677e-05	-0.130592	12	0.033137	0.16373
chr11	69058660	69058978	0.001005	-0.100868	13	0.023512	0.12438
chr11	69063121	69063270	0.046731	-0.101246	5	0.026944	0.12819
chr11	69086916	69087402	1.0416e-05	-0.131025	15	0.028117	0.15914
chr11	69103354	69104004	0.00047164	-0.112852	13	0.031153	0.144
chr11	69251907	69252131	0.036429	-0.106266	14	0.041271	0.14754
chr11	69296725	69296851	0.046731	-0.137166	5	0.072864	0.21003
chr11	69297827	69298312	0.0255	-0.104132	14	0.060579	0.16471
chr11	69377279	69378034	1.6234e-11	-0.103637	41	0.034844	0.13848
chr11	69392168	69392353	0.00486	-0.137782	6	0.026277	0.16406
chr11	69399042	69399263	0.024987	-0.131675	9	0.023387	0.15506
chr11	69435479	69436105	0.00012689	-0.127453	15	0.029977	0.15743
chr11	69447904	69448347	0.025325	-0.101284	6	0.04147	0.14275
chr11	69471268	69471525	0.0043375	-0.125345	14	0.049724	0.17507
chr11	69492332	69492521	0.014058	-0.121248	5	0.023425	0.14467
chr11	69500878	69501210	0.046731	-0.108954	8	0.039292	0.14825
chr11	69539088	69539791	0.00011949	-0.103787	20	0.041612	0.1454
chr11	69599641	69599956	0.029508	-0.117228	10	0.029488	0.14672
chr11	69648039	69648175	0.012115	-0.132886	6	0.04067	0.17356
chr11	69654566	69654698	0.02659	-0.126943	8	0.042569	0.16951
chr11	69765803	69765901	0.0042578	-0.122414	7	0.014816	0.13723
chr11	69811244	69811374	0.012116	-0.103625	6	0.033309	0.13693
chr11	69815416	69815500	0.0198	-0.119674	5	0.016692	0.13637
chr11	69818963	69819226	0.00098061	0.117675	20	0.14454	0.026866
chr11	69962132	69962451	0.0034601	-0.139919	10	0.020134	0.16005
chr11	70077468	70077767	0.048588	-0.105285	9	0.052014	0.1573
chr11	70080971	70081102	0.046731	-0.142026	5	0.036844	0.17887
chr11	70124435	70124827	0.0014345	-0.105658	12	0.016613	0.12227
chr11	70139862	70140445	2.4254e-05	-0.128296	16	0.020408	0.1487
chr11	70212089	70212701	0.0022522	-0.116709	12	0.028657	0.14537
chr11	70246098	70246536	0.00098675	-0.110733	9	0.014147	0.12488
chr11	70255667	70256631	0.026215	-0.102669	11	0.05322	0.15589
chr11	70357630	70358260	0.00026784	-0.102592	15	0.028141	0.13073
chr11	70417887	70418270	0.00031986	-0.100887	7	0.0163	0.11719
chr11	70432345	70432460	0.02495	-0.110831	6	0.049771	0.1606
chr11	70441211	70441508	0.0010253	-0.102259	12	0.033917	0.13618
chr11	70566948	70567223	0.037618	-0.120963	7	0.040623	0.16159
chr11	70671004	70671263	6.5724e-06	-0.108513	11	0.027732	0.13624
chr11	70911806	70912950	0.0174	-0.103713	16	0.050676	0.15439
chr11	71116164	71116411	0.0030503	-0.104561	6	0.034045	0.13861
chr11	71284016	71284193	0.046731	-0.127251	7	0.033259	0.16051
chr11	71343715	71343850	0.014058	-0.128338	5	0.020247	0.14859
chr11	71645357	71645879	0.0198	-0.107808	5	0.013135	0.12094
chr11	71831165	71831398	0.0016156	-0.12875	10	0.031188	0.15994
chr11	72013609	72013745	0.0030503	-0.115668	6	0.014463	0.13013
chr11	72014366	72014480	2.9899e-05	-0.155321	9	0.022686	0.17801
chr11	72211963	72212059	0.014058	0.146988	7	0.1798	0.032814
chr11	72244095	72244322	0.00048608	0.123756	15	0.1596	0.035848
chr11	72415208	72415762	0.036346	-0.103881	6	0.020483	0.12436
chr11	72657235	72657715	0.046731	-0.10219	6	0.047287	0.14948
chr11	72716394	72716551	0.031519	-0.18191	5	0.084238	0.26615
chr11	72776701	72777467	0.017958	-0.10676	8	0.059369	0.16613
chr11	72816047	72816231	0.0174	-0.144554	12	0.065623	0.21018
chr11	72979709	72980343	0.0078229	-0.139652	6	0.02681	0.16646
chr11	73213962	73214497	0.037639	-0.116365	7	0.053637	0.17
chr11	73264606	73264751	0.046731	-0.10022	5	0.0078163	0.10804
chr11	73314999	73315606	0.014058	-0.115112	7	0.030375	0.14549
chr11	73771198	73771299	0.018775	0.128911	7	0.1703	0.041392
chr11	73982307	73982361	0.046731	-0.104594	5	0.044762	0.14936
chr11	74731613	74731668	0.0071101	0.121087	8	0.15254	0.031458
chr11	74754420	74754806	0.040208	-0.110566	15	0.076372	0.18694
chr11	75151404	75151647	0.012115	-0.122598	6	0.036472	0.15907
chr11	75431311	75431426	0.0174	-0.136931	6	0.025348	0.16228
chr11	76007651	76008052	0.046731	0.103382	8	0.11997	0.016584
chr11	76173588	76173736	0.046731	0.117604	6	0.14604	0.028432
chr11	76630029	76630379	0.046731	-0.128695	5	0.073289	0.20198
chr11	76772676	76772935	0.0174	-0.124396	10	0.041723	0.16612
chr11	77191609	77191726	0.036346	-0.123346	6	0.05018	0.17353
chr11	77588747	77588969	0.0019381	-0.114955	17	0.047508	0.16246
chr11	78352207	78352427	0.010099	-0.160869	8	0.049921	0.21079
chr11	78538850	78538926	0.046731	0.113486	7	0.14532	0.031836
chr11	78810395	78810695	0.0198	-0.114876	5	0.040189	0.15507
chr11	80721896	80722027	0.0086302	0.123324	5	0.14093	0.017604
chr11	81386833	81386923	0.014058	0.118071	5	0.13568	0.017609
chr11	81764971	81765056	0.046731	0.176742	7	0.23972	0.06298
chr11	82404064	82404208	0.036346	0.104573	12	0.13758	0.033005
chr11	83155805	83155964	0.021812	-0.111635	10	0.04054	0.15218
chr11	83361528	83361602	0.001813	0.150975	6	0.20274	0.051768
chr11	84584788	84584939	0.021257	0.108208	12	0.14797	0.039758
chr11	84644501	84644660	0.037576	0.17857	7	0.23303	0.054464
chr11	84755445	84755714	6.9223e-06	0.139427	16	0.18924	0.049809
chr11	85426890	85427020	0.031519	0.133985	5	0.17211	0.038125
chr11	86052536	86053569	0.039259	-0.121764	10	0.094445	0.21621
chr11	86731897	86731982	0.0026408	0.189784	7	0.22173	0.031949
chr11	89173715	89173766	0.01869	0.118413	7	0.14233	0.023919
chr11	90063460	90063657	0.0021073	0.112784	8	0.13746	0.024679
chr11	90166630	90167112	0.011805	0.113101	18	0.15789	0.044792
chr11	91800334	91800529	0.0021144	-0.107443	8	0.031018	0.13846
chr11	92225163	92225357	1.036e-05	0.121866	16	0.13851	0.016642
chr11	93693058	93693233	0.046731	0.130094	5	0.15926	0.029168
chr11	94323139	94323378	0.036346	0.142403	8	0.21147	0.06907
chr11	94574718	94574805	0.031519	-0.100207	5	0.016372	0.11658
chr11	95107722	95107868	0.00021339	-0.11675	12	0.083898	0.20065
chr11	95957418	95957691	1.2244e-06	0.108381	24	0.13487	0.026494
chr11	97923133	97923198	0.0198	0.116578	5	0.14592	0.029339
chr11	98243787	98243844	0.031519	0.153352	5	0.18073	0.027376
chr11	98814506	98814608	0.0086302	0.169225	5	0.20593	0.036706
chr11	99668449	99668708	0.014058	0.16753	5	0.19578	0.02825
chr11	100273506	100273701	0.00093922	0.169257	5	0.18124	0.011985
chr11	100285947	100286044	0.0017719	0.182058	6	0.2024	0.020342
chr11	102601321	102601670	0.04779	0.123983	9	0.17073	0.046746
chr11	102747282	102747362	0.046731	-0.107852	7	0.077497	0.18535
chr11	104296457	104296638	0.046731	0.113229	5	0.14635	0.033121
chr11	104651616	104651764	0.014058	0.102013	9	0.13094	0.028923
chr11	105257930	105258318	0.021511	0.117175	10	0.15359	0.036412
chr11	107998791	107998907	0.0198	-0.114811	5	0.024265	0.13908
chr11	108225503	108225662	0.0198	-0.130832	5	0.047412	0.17824
chr11	108616184	108616370	0.0174	0.11365	6	0.14788	0.034233
chr11	110294325	110294611	0.026605	-0.126037	7	0.038426	0.16446
chr11	111327906	111328740	0.019731	-0.112422	11	0.038297	0.15072
chr11	111729744	111729976	0.010103	-0.131722	9	0.03602	0.16774
chr11	112346211	112346428	0.031519	-0.134261	5	0.022484	0.15675
chr11	112865002	112865068	0.046731	-0.125047	5	0.021908	0.14696
chr11	112962906	112962973	0.018232	0.113039	8	0.13453	0.021493
chr11	113204427	113204504	0.046731	-0.126243	6	0.04299	0.16923
chr11	114060099	114060525	2.7081e-11	0.125519	24	0.13038	0.0048569
chr11	114060559	114060751	3.8038e-14	0.133668	32	0.14197	0.0083007
chr11	114199245	114199379	0.0489	0.126705	12	0.17122	0.044517
chr11	115634058	115634217	0.0099329	0.101397	14	0.13976	0.038361
chr11	116068392	116068621	0.031021	0.119357	10	0.17174	0.052382
chr11	116277181	116277330	0.017662	0.112424	7	0.14886	0.03644
chr11	116693491	116693940	0.045652	-0.12787	11	0.057618	0.18549
chr11	117281249	117281402	0.046731	-0.135961	5	0.051113	0.18707
chr11	117557982	117558280	0.037357	0.103424	7	0.14002	0.036598
chr11	117987103	117987338	0.028457	-0.101875	10	0.047136	0.14901
chr11	118705135	118705316	0.036346	-0.141078	6	0.038178	0.17926
chr11	118788457	118788649	0.00094323	-0.169318	11	0.10137	0.27069
chr11	119282561	119282820	0.014058	-0.140095	5	0.021692	0.16179
chr11	119314838	119315107	8.5214e-05	-0.12435	14	0.017827	0.14218
chr11	119371881	119372019	0.046731	-0.134639	6	0.031529	0.16617
chr11	119583114	119583373	0.033505	0.10919	9	0.14151	0.032319
chr11	119629191	119629360	0.036255	-0.116439	6	0.01658	0.13302
chr11	119686709	119686839	0.0078229	0.111798	6	0.13395	0.02215
chr11	119795312	119795614	0.0174	-0.102808	12	0.039769	0.14258
chr11	120056122	120057133	0.046731	0.100211	16	0.15671	0.056497
chr11	120817634	120818697	0.012115	0.104592	13	0.15112	0.046526
chr11	120915390	120915590	0.0095593	0.124206	10	0.16148	0.037273
chr11	121118204	121118365	0.0050702	0.141036	5	0.17898	0.03794
chr11	121797022	121797434	0.046731	0.115346	6	0.15328	0.037931
chr11	123166227	123166545	0.025239	-0.117502	6	0.040464	0.15797
chr11	123431107	123431181	0.00486	0.112115	6	0.1162	0.0040883
chr11	124745569	124745747	0.0010878	-0.123969	24	0.063869	0.18784
chr11	124751261	124751882	0.0058514	-0.104248	20	0.065685	0.16993
chr11	125070415	125070949	0.0033846	-0.140466	9	0.030497	0.17096
chr11	125257632	125257838	0.0198	-0.118234	5	0.021274	0.13951
chr11	125371185	125372014	0.00066052	-0.11339	18	0.05435	0.16774
chr11	125412525	125412704	0.046731	-0.160314	5	0.024455	0.18477
chr11	125886802	125887161	0.00053445	-0.103526	12	0.035916	0.13944
chr11	126284121	126284194	0.046731	-0.15192	6	0.06526	0.21718
chr11	126328583	126328783	0.0071417	-0.137157	9	0.075447	0.2126
chr11	126416634	126416872	3.9197e-11	0.129317	32	0.13578	0.0064587
chr11	126465281	126465439	0.031519	-0.121595	5	0.048782	0.17038
chr11	127514760	127514960	0.00061886	0.16254	14	0.20946	0.046918
chr11	127577074	127577171	0.0198	0.151925	5	0.21825	0.06632
chr11	127647950	127648138	0.0048744	0.134878	10	0.18335	0.048473
chr11	130197454	130197868	0.010059	0.110743	14	0.15715	0.046409
chr11	130628906	130629413	0.024915	-0.114002	9	0.026497	0.1405
chr11	131658498	131658617	0.00059147	-0.12913	7	0.052333	0.18146
chr11	131910471	131910609	2.6191e-06	0.101905	22	0.12352	0.021611
chr11	133719639	133719755	0.0010648	0.133887	6	0.16391	0.030028
chr11	133919006	133919321	0.036346	-0.140725	6	0.022446	0.16317
chr11	134363075	134363317	0.046731	0.121833	5	0.16564	0.043805
chr11	134439509	134439714	0.0086302	-0.119553	5	0.037966	0.15752
chr11	134524198	134524271	5.6177e-05	0.106917	13	0.12392	0.017002
chr11	134537410	134537559	0.00486	-0.101133	8	0.030446	0.13158
chr11	134668325	134668520	0.036346	0.122949	8	0.1556	0.03265
chr11	134955508	134955606	0.0077456	0.153414	6	0.1865	0.033081
chr11_KI270721v1_random	69006	69624	0.0174	0.111575	10	0.19388	0.082302
chr11_KI270827v1_alt	54318	54947	0.018777	-0.117683	7	0.022312	0.14
chr11_KI270831v1_alt	24206	24352	0.0070427	-0.123907	10	0.018652	0.14256
chr11_KI270831v1_alt	130788	131170	0.00015808	-0.132801	8	0.010142	0.14294
chr11_KI270831v1_alt	176569	176621	0.0030503	0.254966	5	0.26548	0.010518
chr11_KI270832v1_alt	99147	99239	0.0078014	-0.135342	6	0.05641	0.19175
chr11_KI270832v1_alt	167299	167396	0.0045923	0.115876	14	0.15335	0.037472
chr11_KI270927v1_alt	115972	116563	0.046731	-0.106814	14	0.073352	0.18017
chr11_KI270927v1_alt	158738	158931	0.013855	0.153393	10	0.19526	0.041867
chr12	188235	188449	0.00029148	-0.115414	24	0.045995	0.16141
chr12	644121	644625	0.0023656	-0.172612	9	0.047367	0.21998
chr12	663225	664012	5.1686e-06	-0.10231	22	0.050251	0.15256
chr12	755641	756014	0.0013167	-0.145177	19	0.076293	0.22147
chr12	1444364	1444699	0.046731	-0.120679	5	0.0050505	0.12573
chr12	1518738	1518914	0.0070648	-0.109965	10	0.015948	0.12591
chr12	1588985	1589125	0.0198	-0.140417	5	0.030995	0.17141
chr12	1829103	1829238	0.026831	-0.119135	7	0.028213	0.14735
chr12	1932240	1932398	0.018664	-0.112053	7	0.025543	0.1376
chr12	2053980	2054050	4.5894e-07	0.123638	16	0.137	0.013367
chr12	2057519	2057580	0.031519	-0.155488	5	0.03916	0.19465
chr12	2128656	2128706	0.0086302	0.210073	5	0.25756	0.04749
chr12	2198158	2198322	0.014058	-0.10886	5	0.030882	0.13974
chr12	2680404	2680590	0.012115	-0.114398	6	0.0086643	0.12306
chr12	3200028	3200317	0.036567	0.103741	12	0.12522	0.021478
chr12	3252426	3252571	0.014058	-0.133139	7	0.05906	0.1922
chr12	3567843	3567986	0.0086302	0.128191	5	0.17144	0.043249
chr12	3600864	3601054	0.014058	-0.112488	5	0.018844	0.13133
chr12	3838805	3838888	0.0048293	-0.13817	11	0.041371	0.17954
chr12	4289451	4289736	0.014058	-0.107386	7	0.028975	0.13636
chr12	4429685	4429780	0.0198	0.131383	5	0.17784	0.046452
chr12	4830625	4831043	0.0174	-0.109074	10	0.034514	0.14359
chr12	4910577	4910628	0.0174	0.113301	6	0.12129	0.0079861
chr12	5437796	5437908	0.046731	-0.134139	6	0.061271	0.19541
chr12	5685850	5686136	0.0198	-0.118059	5	0.021528	0.13959
chr12	5718136	5718664	0.036346	-0.10683	8	0.040049	0.14688
chr12	6067644	6067854	0.036346	-0.130563	6	0.03468	0.16524
chr12	6182744	6183065	0.00030423	-0.145292	13	0.034879	0.18017
chr12	6183465	6184118	0.046731	-0.110944	14	0.052029	0.16297
chr12	6223703	6224013	0.014058	-0.123537	12	0.072462	0.196
chr12	6250742	6250927	0.046731	-0.106916	6	0.055116	0.16203
chr12	6312346	6312640	0.046731	-0.13889	5	0.0418	0.18069
chr12	6338331	6338881	0.010063	-0.117486	12	0.051162	0.16865
chr12	6552480	6552629	0.0198	-0.125615	5	0.048763	0.17438
chr12	6555465	6555639	1.0233e-09	0.107259	24	0.13347	0.026208
chr12	6555929	6556204	3.0164e-07	0.102802	20	0.12382	0.021019
chr12	6556362	6556585	0.031519	-0.109658	13	0.054402	0.16406
chr12	6989216	6989593	2.3622e-06	-0.11596	20	0.042432	0.15839
chr12	7440218	7440333	0.0015391	0.112407	15	0.16446	0.052053
chr12	7979639	7979726	0.025337	0.136605	6	0.16015	0.023542
chr12	8095263	8095373	0.0088095	0.106391	11	0.14004	0.033648
chr12	8496954	8497203	0.0174	-0.109692	6	0.023701	0.13339
chr12	9025401	9025595	0.0063713	-0.104182	7	0.017737	0.12192
chr12	9449443	9449649	0.046731	-0.105163	10	0.047163	0.15233
chr12	9749119	9749221	0.046731	-0.112841	10	0.024635	0.13748
chr12	9952637	9953046	3.5056e-06	0.101279	30	0.15063	0.049354
chr12	10153988	10154389	0.014058	-0.103173	12	0.062705	0.16588
chr12	11743579	11743834	0.046731	-0.145381	6	0.065934	0.21131
chr12	11878190	11878743	0.015885	-0.122804	11	0.045831	0.16864
chr12	12926421	12926925	0.0027813	-0.115981	13	0.053245	0.16923
chr12	13135703	13135916	0.046731	-0.122895	6	0.018616	0.14151
chr12	13200441	13200616	0.031519	-0.109163	5	0.043262	0.15242
chr12	14239417	14240424	0.00099108	-0.10133	19	0.030077	0.13141
chr12	14260646	14261171	4.9515e-07	-0.117233	19	0.035756	0.15299
chr12	14262443	14262627	0.0020969	-0.128603	8	0.03379	0.16239
chr12	14975842	14976071	0.026843	0.161865	7	0.19333	0.031463
chr12	15083222	15083415	0.031519	0.117642	5	0.16561	0.047972
chr12	16126359	16126425	0.046731	0.111754	5	0.15404	0.042283
chr12	16786701	16786836	0.0198	-0.141024	5	0.057596	0.19862
chr12	19205288	19205572	0.046731	-0.133627	5	0.024454	0.15808
chr12	19597399	19597923	0.048751	-0.106031	9	0.055195	0.16123
chr12	23595387	23595543	0.046731	0.123619	7	0.1872	0.063583
chr12	23743371	23743671	0.0095466	0.109741	10	0.16315	0.053408
chr12	23923134	23923246	0.018055	0.136111	7	0.16293	0.026822
chr12	24951384	24951503	0.0063337	-0.133779	7	0.024553	0.15833
chr12	25054561	25054945	0.03386	-0.118475	8	0.036976	0.15545
chr12	25969250	25969643	0.036346	-0.136559	6	0.04733	0.18389
chr12	29114181	29114420	0.010255	0.115208	12	0.14259	0.027384
chr12	29206854	29207535	0.046731	-0.104042	8	0.055255	0.1593
chr12	29389362	29389527	0.033702	-0.109343	11	0.034986	0.14433
chr12	29640752	29641567	0.029365	-0.100334	12	0.046483	0.14682
chr12	30844801	30844887	0.046731	-0.103884	6	0.0061976	0.11008
chr12	30931707	30932043	0.0085705	-0.189267	5	0.06026	0.24953
chr12	31246706	31247058	0.014058	-0.135407	7	0.025703	0.16111
chr12	31749479	31749888	0.046731	-0.114467	10	0.049942	0.16441
chr12	34148450	34148556	0.026584	-0.150274	7	0.049851	0.20013
chr12	34349524	34349627	0.012131	-0.102375	6	0.039284	0.14166
chr12	37890515	37890656	0.046731	0.109472	13	0.14432	0.034844
chr12	38079171	38079271	0.046731	0.147658	7	0.183	0.035342
chr12	41672466	41672797	0.00026978	0.103525	19	0.13859	0.035069
chr12	43373899	43373978	0.0094945	0.128796	10	0.19053	0.061737
chr12	45852583	45852892	0.00486	-0.123537	6	0.023774	0.14731
chr12	47182321	47182539	0.036346	0.1542	6	0.19982	0.045616
chr12	47825028	47825219	0.0013322	-0.147904	8	0.060557	0.20846
chr12	48715481	48715574	0.046731	-0.125191	7	0.040644	0.16584
chr12	48728323	48728535	0.044652	0.114179	11	0.1621	0.047917
chr12	49215556	49215660	0.046731	-0.144112	5	0.041844	0.18596
chr12	49233702	49234040	0.01512	-0.101952	18	0.045489	0.14744
chr12	49266613	49266773	0.018976	-0.130321	11	0.05795	0.18827
chr12	49389215	49389330	0.0010806	-0.104503	11	0.011519	0.11602
chr12	49955221	49955354	0.0058512	-0.100012	12	0.039778	0.13979
chr12	49962123	49962212	0.039079	-0.119872	10	0.058606	0.17848
chr12	50843076	50843140	0.0062928	-0.103283	7	0.029456	0.13274
chr12	51024564	51024646	0.0016372	-0.185027	7	0.018556	0.20358
chr12	51915489	51915552	0.00029766	-0.138562	8	0.013122	0.15168
chr12	51938824	51938944	0.014058	-0.209671	5	0.027349	0.23702
chr12	51970985	51971470	0.033512	-0.135254	9	0.050348	0.1856
chr12	52260511	52261153	0.046731	-0.113627	7	0.068504	0.18213
chr12	52409150	52409361	0.004581	-0.112954	17	0.056263	0.16922
chr12	52494507	52494797	0.0198	-0.158384	5	0.011425	0.16981
chr12	52904194	52904723	1.0262e-05	-0.182785	20	0.083096	0.26588
chr12	53126818	53126968	0.036346	0.132725	6	0.15432	0.021593
chr12	53219932	53220591	3.7431e-22	0.127008	38	0.13778	0.010773
chr12	53366288	53366556	0.0029934	-0.141795	20	0.05598	0.19777
chr12	53696937	53697265	0.0029224	-0.173636	6	0.010937	0.18457
chr12	54004733	54004957	0.026727	0.119691	7	0.14455	0.024858
chr12	54127618	54127869	0.0034087	-0.100328	9	0.023598	0.12393
chr12	54159264	54159419	0.037576	-0.120159	7	0.059364	0.17952
chr12	54229490	54229923	0.037589	-0.12974	7	0.0406	0.17034
chr12	55715239	55715507	0.00486	-0.19487	6	0.042403	0.23727
chr12	56700497	56700861	0.00063996	-0.107766	18	0.042259	0.15002
chr12	57073295	57073575	0.026803	-0.10257	7	0.090982	0.19355
chr12	57142576	57143017	0.0033514	-0.130813	9	0.025846	0.15666
chr12	57224739	57224948	0.00038939	-0.104555	19	0.026821	0.13138
chr12	57736236	57736577	8.1984e-06	-0.132381	19	0.0482	0.18058
chr12	59209728	59210207	0.013871	0.125484	10	0.17706	0.051573
chr12	59888181	59888404	1.0472e-05	0.132037	16	0.15218	0.020138
chr12	60571662	60571724	0.036346	0.112965	6	0.12328	0.010317
chr12	61617332	61617605	0.0046953	0.100196	24	0.14239	0.042195
chr12	62932790	62932881	0.036346	0.122843	6	0.19228	0.069434
chr12	64389378	64389716	8.6152e-06	-0.111594	17	0.02298	0.13457
chr12	64516400	64516535	0.00348	0.113923	10	0.14985	0.035929
chr12	64608358	64608593	0.00062146	-0.164767	16	0.077799	0.24257
chr12	66170415	66170486	0.018745	-0.126157	8	0.024473	0.15063
chr12	66171503	66171586	0.046731	0.101832	5	0.12511	0.023276
chr12	68222555	68222678	0.036346	-0.114034	6	0.033897	0.14793
chr12	68584543	68584827	0.046731	0.101522	7	0.12544	0.023918
chr12	69024570	69024674	0.036346	-0.107604	6	0.032002	0.13961
chr12	69624354	69624443	0.0050754	0.103279	5	0.11749	0.014206
chr12	69699059	69699283	0.0198	-0.105821	5	0.035885	0.14171
chr12	69705213	69705299	0.036346	0.128376	6	0.14629	0.017918
chr12	71376698	71376870	0.0046	0.106947	18	0.14823	0.04128
chr12	75690527	75690814	0.0012877	-0.160892	8	0.024168	0.18506
chr12	75863590	75863850	0.026716	-0.114624	7	0.060347	0.17497
chr12	76763290	76763354	0.0174	-0.156455	6	0.047353	0.20381
chr12	76898926	76899114	0.00083243	-0.158054	8	0.02205	0.1801
chr12	80808565	80808734	0.046731	0.122333	10	0.16843	0.046098
chr12	81705166	81705220	0.0086302	0.141861	5	0.17952	0.037656
chr12	84569902	84570082	0.0037868	0.115599	13	0.14607	0.030476
chr12	86299175	86299396	0.012087	0.129465	11	0.16875	0.039283
chr12	89281838	89282203	0.046731	-0.115426	6	0.0328	0.14823
chr12	90869265	90869322	0.046731	0.141453	5	0.18373	0.042275
chr12	92224945	92225148	0.046731	-0.142376	5	0.041035	0.18341
chr12	93409297	93410203	0.014058	-0.13811	5	0.038102	0.17621
chr12	93818842	93818961	0.0198	-0.18382	5	0.047141	0.23096
chr12	94127200	94127551	0.046731	-0.101174	5	0.029322	0.1305
chr12	94149903	94150122	2.5271e-10	0.114459	28	0.14814	0.033681
chr12	94176058	94176242	0.031519	-0.121536	5	0.018585	0.14012
chr12	94640678	94640893	0.0042578	-0.144191	7	0.059502	0.20369
chr12	94731841	94732152	0.0094352	-0.136327	7	0.032257	0.16858
chr12	95573966	95574082	0.0003054	-0.170795	7	0.017354	0.18815
chr12	95623598	95623761	0.031519	-0.137329	5	0.044879	0.18221
chr12	96055383	96055545	0.0198	-0.183965	5	0.036085	0.22005
chr12	96108577	96108759	0.036346	-0.119751	6	0.040292	0.16004
chr12	96487025	96487200	0.00060352	-0.114324	9	0.023008	0.13733
chr12	97161037	97161126	0.026772	0.142803	7	0.20257	0.059772
chr12	98397939	98398006	0.0030503	-0.142751	5	0.01892	0.16167
chr12	98461611	98461840	0.0174	0.109799	10	0.16432	0.054522
chr12	98500587	98500970	0.046731	-0.101346	8	0.043782	0.14513
chr12	98519102	98519236	0.0070819	-0.159935	8	0.066568	0.2265
chr12	98773744	98773923	0.046731	0.14129	5	0.16305	0.021763
chr12	98894729	98894818	2.9768e-07	0.140278	13	0.15796	0.017685
chr12	98895132	98895223	0.0015162	0.104084	15	0.12467	0.020585
chr12	100185991	100186308	0.048774	-0.134231	9	0.082808	0.21704
chr12	100689694	100689798	0.0198	0.106719	5	0.16102	0.054302
chr12	102958866	102958916	0.0026649	0.112753	7	0.15373	0.040974
chr12	103965858	103965970	0.0018027	-0.112914	6	0.023754	0.13667
chr12	103973348	103973488	0.0174	-0.122757	6	0.034398	0.15715
chr12	104673713	104673878	0.036346	-0.122177	6	0.019997	0.14217
chr12	104720862	104721009	0.010077	-0.14053	9	0.049507	0.19004
chr12	104959063	104959275	0.036346	-0.106993	8	0.032811	0.1398
chr12	105221686	105222580	1.2306e-07	-0.11121	21	0.038155	0.14937
chr12	106245893	106246480	0.00030986	-0.122	11	0.044568	0.16657
chr12	106477717	106477818	0.010037	-0.101839	8	0.074732	0.17657
chr12	106477835	106478186	0.046731	-0.105846	6	0.042605	0.14845
chr12	107337502	107337726	0.025145	-0.120493	6	0.036479	0.15697
chr12	107892619	107892854	0.011945	0.100665	11	0.15665	0.055982
chr12	108324952	108325232	0.0198	-0.124269	5	0.024173	0.14844
chr12	108628867	108629039	0.014058	-0.108703	7	0.043222	0.15193
chr12	108640202	108640615	0.0070427	-0.143951	8	0.051091	0.19504
chr12	108768194	108768763	3.161e-05	-0.114366	19	0.040702	0.15507
chr12	108807059	108807376	0.036346	-0.111082	8	0.042843	0.15393
chr12	108837627	108838296	0.0078901	-0.120233	12	0.045417	0.16565
chr12	109461787	109461904	0.046731	-0.116242	7	0.038178	0.15442
chr12	109478606	109478668	0.0077862	0.124829	6	0.1571	0.032275
chr12	109888902	109889300	0.02872	-0.108163	12	0.073514	0.18168
chr12	110079752	110079970	0.014058	-0.119253	7	0.039859	0.15911
chr12	110121004	110121203	0.0174	-0.152488	6	0.040611	0.1931
chr12	110537785	110537978	0.046731	-0.10665	8	0.038549	0.1452
chr12	110570330	110570577	0.035606	-0.149731	8	0.035702	0.18543
chr12	110578017	110579286	0.0174	-0.107567	19	0.074949	0.18252
chr12	110661823	110661916	0.014058	-0.136994	5	0.038311	0.1753
chr12	110796993	110797252	0.00032834	-0.128603	7	0.011017	0.13962
chr12	111093417	111093648	0.014058	-0.118725	7	0.030752	0.14948
chr12	111102301	111102408	0.031519	-0.10574	5	0.012533	0.11827
chr12	111181606	111181698	0.046731	-0.105872	5	0.02294	0.12881
chr12	111418391	111418475	0.036346	-0.129603	12	0.026579	0.15618
chr12	111465586	111465638	0.0030503	-0.115057	5	0.015128	0.13018
chr12	111762840	111762907	0.0198	-0.136771	5	0.019882	0.15665
chr12	111766167	111766368	0.017852	-0.116664	9	0.063229	0.17989
chr12	111780180	111780357	0.046731	-0.127187	5	0.017034	0.14422
chr12	111840986	111841053	0.0174	-0.100216	6	0.027745	0.12796
chr12	112012173	112012498	0.002398	-0.1046	10	0.04048	0.14508
chr12	112318048	112318653	0.036346	-0.149056	6	0.034188	0.18324
chr12	112725487	112725692	0.025017	0.11603	6	0.15331	0.037277
chr12	113093503	113093660	0.00065222	-0.110467	18	0.044771	0.15524
chr12	113299671	113299935	0.026205	-0.115161	8	0.048089	0.16325
chr12	113463360	113463444	0.026304	0.105728	15	0.11866	0.012931
chr12	114392847	114392977	0.0017183	-0.130484	5	0.0082791	0.13876
chr12	114686780	114687006	0.019498	-0.108087	11	0.036563	0.14465
chr12	114778801	114778888	0.037028	0.130548	7	0.17757	0.04702
chr12	115375240	115375487	0.046731	-0.105367	6	0.048265	0.15363
chr12	115608488	115608837	0.046731	-0.12308	5	0.036891	0.15997
chr12	116055801	116056006	0.0077936	-0.104764	6	0.021985	0.12675
chr12	116318239	116318411	8.5493e-05	-0.137554	12	0.033268	0.17082
chr12	116558984	116559274	0.0016086	-0.142416	11	0.031896	0.17431
chr12	116560394	116560498	0.026839	-0.117044	7	0.04335	0.16039
chr12	116695269	116695578	0.012085	-0.11097	6	0.044292	0.15526
chr12	116712479	116713126	0.039617	-0.109009	17	0.05337	0.16238
chr12	117048084	117048255	0.036346	-0.12205	6	0.048252	0.1703
chr12	117517736	117517826	0.0086302	0.103043	5	0.15072	0.047674
chr12	117539744	117539834	0.0063746	-0.134206	7	0.044717	0.17892
chr12	117629149	117629282	0.046731	0.111894	5	0.15344	0.041545
chr12	117983972	117984062	0.01211	0.106917	11	0.14379	0.036875
chr12	118133468	118133528	0.0026743	-0.146742	7	0.046756	0.1935
chr12	119869852	119870321	0.033245	-0.146366	9	0.067499	0.21387
chr12	119910430	119910523	0.014058	-0.111498	5	0.02398	0.13548
chr12	120228879	120229431	0.0056643	-0.111948	14	0.043571	0.15552
chr12	120756245	120756344	0.025335	0.146682	6	0.18679	0.040108
chr12	120760592	120760664	0.031519	-0.102234	5	0.025248	0.12748
chr12	121298109	121298277	0.018542	-0.175182	7	0.030939	0.20612
chr12	121468115	121468634	0.046731	-0.114887	7	0.04577	0.16066
chr12	121536218	121536448	0.00083759	0.11454	13	0.14582	0.031282
chr12	121536805	121536922	0.046731	0.125949	5	0.14042	0.014468
chr12	121575898	121576242	0.01869	-0.125066	13	0.063021	0.18809
chr12	121793155	121793243	0.014294	-0.138206	9	0.046635	0.18484
chr12	122004394	122004736	0.0012672	-0.121494	14	0.060579	0.18207
chr12	122096020	122096706	0.0014954	-0.121183	12	0.026755	0.14794
chr12	122464482	122464722	0.026511	-0.122059	7	0.054309	0.17637
chr12	122886933	122887270	0.046731	-0.171578	5	0.051082	0.22266
chr12	122947223	122947386	0.0078014	-0.123064	6	0.044073	0.16714
chr12	123025462	123025683	0.036346	0.100108	6	0.1317	0.031591
chr12	123063072	123063301	0.0198	-0.131305	5	0.057481	0.18879
chr12	123272545	123273013	0.031519	-0.100007	14	0.058693	0.1587
chr12	123463678	123463795	0.046731	-0.110362	5	0.029263	0.13963
chr12	123519545	123519619	0.0086302	-0.116693	5	0.038401	0.15509
chr12	123909224	123909382	0.00486	-0.149236	10	0.025191	0.17443
chr12	124044516	124044684	0.014058	0.142431	5	0.18321	0.040775
chr12	124286693	124287283	0.0174	-0.101942	6	0.037699	0.13964
chr12	124298901	124299227	0.01845	0.107759	7	0.14987	0.042109
chr12	124411778	124411959	0.014582	-0.149693	8	0.023197	0.17289
chr12	124432855	124432995	0.046731	-0.126966	6	0.035964	0.16293
chr12	124452845	124453014	0.046731	-0.125751	6	0.036948	0.1627
chr12	124456768	124456859	0.006366	-0.204156	7	0.058909	0.26307
chr12	124497239	124497494	0.0012755	-0.122821	14	0.066771	0.18959
chr12	124520297	124520388	0.0174	-0.159239	6	0.068842	0.22808
chr12	124546160	124546246	0.0086302	-0.154694	5	0.049818	0.20451
chr12	124565242	124565299	0.046731	-0.111581	6	0.058539	0.17012
chr12	124608393	124608669	0.014542	-0.131321	8	0.042826	0.17415
chr12	124629928	124630372	0.0048461	-0.128113	8	0.037232	0.16535
chr12	124686889	124687902	0.025239	-0.104883	14	0.068503	0.17339
chr12	124712931	124713212	0.00098392	-0.175224	13	0.073485	0.24871
chr12	124734364	124734569	0.010044	-0.101335	14	0.046103	0.14744
chr12	124736942	124737215	0.018081	-0.100559	9	0.0574	0.15796
chr12	124912948	124913303	0.018745	-0.144	11	0.08456	0.22856
chr12	124923733	124924222	0.046731	-0.116569	13	0.045935	0.1625
chr12	125050122	125050179	0.00017711	-0.156705	7	0.018844	0.17555
chr12	125097707	125097899	0.046731	-0.123834	7	0.051328	0.17516
chr12	125415146	125415668	0.010099	0.110474	9	0.13865	0.028171
chr12	125432074	125432178	0.046731	0.162945	5	0.19912	0.036178
chr12	126326447	126326791	0.026605	0.122677	7	0.13836	0.015688
chr12	128313317	128313677	0.004837	-0.107651	8	0.025211	0.13286
chr12	128364411	128364490	0.046731	-0.106555	6	0.036882	0.14344
chr12	128476203	128476465	0.026277	-0.117125	8	0.019768	0.13689
chr12	128853661	128853799	1.5156e-05	0.109751	22	0.12838	0.018627
chr12	128853832	128854043	5.5831e-08	0.110639	27	0.13247	0.02183
chr12	129441298	129441499	0.046731	0.104066	6	0.14253	0.038467
chr12	129839782	129839882	0.026605	0.232799	8	0.25967	0.026872
chr12	129903985	129904124	6.2801e-05	0.110462	23	0.13713	0.026669
chr12	130996253	130996606	0.00013829	0.129745	13	0.18149	0.051741
chr12	131020200	131020728	0.01544	-0.108816	11	0.038505	0.14732
chr12	131070547	131070688	0.0034945	0.150429	10	0.18415	0.033726
chr12	131459849	131460266	0.031519	-0.10181	14	0.052072	0.15388
chr12	131682009	131682109	0.014058	-0.10638	5	0.018116	0.1245
chr12	131737163	131737448	0.0010059	-0.142701	13	0.035317	0.17802
chr12	131851539	131851604	0.046731	-0.11684	5	0.03962	0.15646
chr12	131985176	131985371	0.0174	-0.103204	6	0.054047	0.15725
chr12	132070380	132070468	0.046731	-0.101784	5	0.017569	0.11935
chr12	132167776	132168082	4.266e-06	-0.102874	18	0.032861	0.13573
chr12	132292975	132293285	0.036346	0.107788	8	0.15964	0.051852
chr12	132374804	132374901	0.0198	0.10029	5	0.14666	0.046366
chr12	132433174	132433346	0.0073867	-0.102064	17	0.042775	0.14484
chr12	132437988	132438498	8.8685e-06	-0.101389	23	0.04596	0.14735
chr12	132488415	132489043	0.00022938	-0.100151	20	0.042804	0.14295
chr12	132522867	132523003	0.0174	-0.117271	6	0.020722	0.13799
chr12	132546147	132546537	0.036346	0.116752	12	0.16967	0.052916
chr12	132582721	132582808	0.004837	-0.122873	11	0.048941	0.17181
chr12	132695507	132695685	0.00023754	-0.120009	9	0.035786	0.15579
chr12	133179151	133179388	0.025239	0.128519	9	0.16968	0.041164
chr12_KI270833v1_alt	5947	6158	0.046731	0.14614	5	0.18085	0.034714
chr12_KI270833v1_alt	11931	12029	0.0174	-0.124403	6	0.025127	0.14953
chr12_KI270833v1_alt	16007	16068	0.00011195	0.124209	10	0.15723	0.033018
chr12_KI270835v1_alt	143044	143103	0.0198	0.127026	5	0.13396	0.0069358
chr12_KI270904v1_alt	492654	493270	0.0019318	-0.114118	23	0.0514	0.16552
chr13	18600252	18600377	0.037672	-0.124229	13	0.054878	0.17911
chr13	19561757	19561816	0.014058	0.163532	5	0.19063	0.0271
chr13	19859079	19859503	0.021029	-0.103886	10	0.036099	0.13999
chr13	19899096	19899171	0.0198	-0.218544	5	0.090526	0.30907
chr13	21590768	21590840	0.031519	-0.123941	5	0.062728	0.18667
chr13	21812794	21813301	0.031519	-0.103465	5	0.030323	0.13379
chr13	22610979	22611117	0.037618	0.154707	7	0.18878	0.034069
chr13	23147428	23147484	0.046731	-0.140362	5	0.033598	0.17396
chr13	23608539	23609008	0.028948	-0.116812	13	0.057613	0.17442
chr13	23726015	23726134	0.037554	-0.112082	7	0.072043	0.18413
chr13	24023699	24024013	0.046731	-0.119354	5	0.038782	0.15814
chr13	24060779	24060945	0.0198	-0.17815	5	0.066004	0.24415
chr13	24371640	24371838	0.0086302	-0.132494	5	0.022517	0.15501
chr13	24722265	24722467	0.031519	0.168613	5	0.19812	0.029509
chr13	25293804	25293893	0.0198	0.16827	5	0.18245	0.014181
chr13	25977376	25977461	0.0198	-0.11264	5	0.029995	0.14264
chr13	26966040	26966306	0.029368	-0.128943	12	0.065998	0.19494
chr13	27978116	27978336	2.0695e-14	0.147514	39	0.17858	0.031071
chr13	28100391	28100475	0.0028251	0.110455	13	0.12564	0.015188
chr13	28494516	28494626	0.00020038	0.11839	14	0.13542	0.017027
chr13	28532453	28532643	1.9319e-11	0.136586	30	0.14877	0.012181
chr13	29148622	29148679	0.046731	0.109129	6	0.14293	0.033797
chr13	29512247	29512433	0.012115	-0.138875	6	0.042558	0.18143
chr13	29562055	29562450	0.036346	-0.131099	8	0.075792	0.20689
chr13	30577382	30577826	0.046731	-0.140241	7	0.030798	0.17104
chr13	30740416	30740926	0.0034041	-0.136458	10	0.061059	0.19752
chr13	31302640	31302691	0.0198	0.106605	5	0.12829	0.021688
chr13	31647876	31647964	0.046731	0.116933	5	0.15238	0.035446
chr13	32314711	32314914	0.012021	-0.104008	11	0.039418	0.14343
chr13	32426283	32426755	2.2274e-06	-0.163753	13	0.050657	0.21441
chr13	32892567	32892632	0.014058	0.132476	5	0.17674	0.044263
chr13	33610698	33610863	0.0023816	-0.134232	11	0.068609	0.20284
chr13	34695494	34695643	0.0198	-0.135958	5	0.032893	0.16885
chr13	34753789	34753939	0.037611	0.148358	7	0.17765	0.029288
chr13	34799343	34799409	0.037576	0.130526	7	0.16789	0.037362
chr13	35864330	35864551	0.00028183	0.109903	19	0.15975	0.049848
chr13	37295247	37295334	0.0086302	-0.105203	5	0.0173	0.1225
chr13	38687893	38688090	0.0017373	0.100273	16	0.13084	0.03057
chr13	39349673	39349957	0.046731	-0.112082	5	0.027095	0.13918
chr13	40311951	40312020	0.014058	-0.120347	5	0.0098459	0.13019
chr13	40614179	40614678	0.037636	-0.113973	7	0.035169	0.14914
chr13	40771741	40771968	0.046731	-0.160245	5	0.029791	0.19004
chr13	40922055	40922246	0.008604	-0.132257	13	0.078712	0.21097
chr13	41971966	41972245	0.046731	-0.116086	5	0.04943	0.16552
chr13	42011749	42012089	0.033744	-0.102974	9	0.046963	0.14994
chr13	42405826	42406066	0.014058	-0.100443	7	0.036097	0.13654
chr13	44397352	44397513	0.022051	-0.121739	10	0.065572	0.18731
chr13	44434509	44434854	0.0023656	-0.142062	10	0.050447	0.19251
chr13	45713550	45713850	0.00012242	0.121943	20	0.17057	0.04863
chr13	46143981	46144052	0.037576	0.112457	7	0.16508	0.052625
chr13	46354892	46355148	0.0030503	-0.124788	5	0.0098658	0.13465
chr13	46386630	46386786	0.0049407	0.105817	9	0.11503	0.0092144
chr13	46641785	46641972	0.0086302	-0.124178	5	0.02937	0.15355
chr13	48749762	48750226	0.0010977	-0.104561	11	0.021079	0.12564
chr13	48774352	48774613	0.036346	0.131559	6	0.17979	0.048234
chr13	49221266	49221385	0.0010576	-0.103301	12	0.021856	0.12516
chr13	50128574	50128742	0.0023657	0.144698	9	0.18081	0.036109
chr13	50715680	50715776	0.046731	-0.106447	5	0.032335	0.13878
chr13	52080365	52080492	0.036346	0.145543	6	0.20662	0.061076
chr13	52445531	52445663	0.036894	-0.136409	7	0.062031	0.19844
chr13	52709610	52709833	0.046731	0.100781	5	0.11809	0.01731
chr13	52815207	52815349	9.4068e-06	0.167731	13	0.19596	0.028224
chr13	52845511	52845782	0.036346	0.104639	6	0.16913	0.064486
chr13	52846282	52846444	1.292e-08	0.124864	21	0.15166	0.026791
chr13	52846559	52846690	0.014058	0.104027	12	0.14315	0.039122
chr13	52848649	52848959	1.346e-05	0.119499	18	0.16362	0.044123
chr13	54767086	54767331	0.0087153	0.116384	11	0.15644	0.040053
chr13	54963131	54963329	0.018269	0.10946	9	0.1295	0.020042
chr13	55323763	55323954	0.038738	0.125723	13	0.17812	0.052393
chr13	55605869	55606052	0.046731	0.102668	5	0.13344	0.030776
chr13	56556270	56556444	0.012115	0.126864	11	0.16786	0.040999
chr13	56900577	56900815	0.0076295	0.116154	19	0.17157	0.055414
chr13	58477817	58477912	0.0198	-0.150856	5	0.015208	0.16606
chr13	58694859	58695071	0.046731	0.111412	8	0.15611	0.044695
chr13	59055875	59056176	0.0014577	0.153328	13	0.18624	0.032912
chr13	59639078	59639277	0.031519	-0.102596	5	0.042646	0.14524
chr13	60173057	60173160	0.031519	0.117098	5	0.13154	0.014439
chr13	60764897	60765002	0.031519	0.122962	5	0.17403	0.051068
chr13	62161051	62161153	0.031519	0.104989	5	0.14954	0.044548
chr13	63027290	63027457	0.010217	0.100896	12	0.1468	0.045907
chr13	63803070	63803258	0.024393	0.104714	13	0.17696	0.072247
chr13	64443119	64443430	0.014058	-0.10623	9	0.030676	0.13691
chr13	67773267	67773336	0.0198	0.120315	5	0.17085	0.050537
chr13	68809123	68809343	0.02551	0.111333	14	0.1625	0.051172
chr13	70711200	70711347	0.0071499	0.101946	9	0.13287	0.030919
chr13	71022569	71022700	0.037457	0.155887	7	0.1993	0.043409
chr13	71161911	71162245	0.00486	0.116305	6	0.12717	0.010863
chr13	72605731	72606121	0.019388	0.10148	14	0.13583	0.034351
chr13	73053763	73053911	0.014603	0.13215	8	0.17765	0.045504
chr13	73061793	73062504	0.00073201	-0.10709	15	0.043466	0.15056
chr13	74426201	74426383	0.0046936	0.10266	11	0.14561	0.042953
chr13	75634953	75635597	4.1418e-05	-0.12679	26	0.08143	0.20822
chr13	76441424	76441676	0.046731	0.103533	5	0.13465	0.031121
chr13	76884253	76884495	0.00023336	-0.106201	9	0.019961	0.12616
chr13	77025447	77025502	0.00486	-0.177475	6	0.048623	0.2261
chr13	80863290	80863425	0.00070946	0.131636	10	0.16182	0.030182
chr13	81070037	81070217	0.00486	0.134527	9	0.18316	0.04863
chr13	81576525	81576779	3.8056e-05	0.165888	15	0.20447	0.038586
chr13	81825104	81825362	0.00095295	0.101044	16	0.16206	0.06102
chr13	81910825	81910918	0.024335	0.108764	9	0.13469	0.025927
chr13	83011661	83011947	0.048739	0.114367	9	0.15012	0.035749
chr13	85589947	85590104	0.046731	-0.106719	7	0.049886	0.1566
chr13	86272845	86273028	0.0198	0.151366	5	0.17994	0.028573
chr13	87671695	87671830	0.0028179	0.109581	13	0.1295	0.019921
chr13	87672660	87672715	0.0030503	0.175309	5	0.19978	0.02447
chr13	88292019	88292104	0.046731	0.151555	5	0.175	0.023441
chr13	88348799	88348975	0.014058	0.125504	9	0.17441	0.048902
chr13	89861931	89862146	0.031519	0.155812	5	0.19673	0.040916
chr13	91061520	91061726	0.0003907	0.166494	9	0.19143	0.024937
chr13	92081137	92081420	0.016305	0.113122	11	0.16979	0.056664
chr13	93453729	93453993	0.010099	0.117139	9	0.15199	0.034849
chr13	95115881	95115986	0.0086302	0.172908	5	0.2048	0.031892
chr13	97367508	97367787	0.046731	-0.122021	8	0.030851	0.15287
chr13	98142227	98142319	0.0174	-0.160535	6	0.014445	0.17498
chr13	98463122	98463218	0.025239	-0.135449	6	0.017137	0.15259
chr13	98506121	98506562	0.00016033	-0.116693	16	0.047229	0.16392
chr13	98568059	98568350	0.0198	-0.13894	14	0.11853	0.25747
chr13	98570635	98571194	1.682e-07	-0.181925	13	0.033061	0.21499
chr13	98972158	98972591	0.014058	-0.125277	5	0.037756	0.16303
chr13	99356195	99356458	0.046731	0.116493	6	0.17443	0.057938
chr13	99498261	99498457	0.026605	-0.115679	7	0.025377	0.14106
chr13	99761208	99761276	0.0198	0.183672	5	0.21986	0.036185
chr13	99849444	99849679	0.0030503	0.147065	5	0.16361	0.016543
chr13	99887506	99887913	0.018745	0.107717	7	0.12594	0.01822
chr13	99997393	99997461	0.033646	0.112304	9	0.16655	0.054249
chr13	100811531	100811844	0.046731	-0.108025	12	0.052718	0.16074
chr13	100955595	100955926	0.018718	0.119431	7	0.1362	0.016765
chr13	101069944	101070301	0.046731	0.113769	8	0.14605	0.032284
chr13	101416780	101416831	0.0023258	0.107934	9	0.13175	0.023813
chr13	101916533	101916854	9.0299e-05	0.10816	25	0.14183	0.033671
chr13	104346369	104346448	0.046731	0.130229	5	0.16323	0.032999
chr13	104427095	104427210	0.031519	0.127368	5	0.17586	0.048491
chr13	104472078	104472596	0.037601	0.102202	7	0.16036	0.058155
chr13	104955566	104955654	0.031519	0.126421	5	0.16663	0.040208
chr13	105844277	105844443	0.0174	0.101319	14	0.1417	0.040384
chr13	105970241	105970304	0.0198	0.258144	5	0.30501	0.046864
chr13	106472175	106472383	0.00030986	-0.114	7	0.02301	0.13701
chr13	106822453	106822719	0.024362	0.102121	13	0.16436	0.062241
chr13	107178713	107178837	0.0096239	0.121709	10	0.16476	0.043049
chr13	107417785	107418144	0.026831	-0.134102	7	0.029849	0.16395
chr13	107720133	107720379	0.036346	0.105781	8	0.13732	0.031543
chr13	108886673	108886836	0.00029253	0.139501	10	0.15064	0.011142
chr13	109869668	109870317	6.863e-06	-0.102448	32	0.036853	0.1393
chr13	110183694	110183748	0.0030503	-0.118198	6	0.015958	0.13416
chr13	110242780	110243466	0.0174	-0.117058	12	0.04537	0.16243
chr13	110276753	110276863	0.0086302	-0.113066	5	0.033847	0.14691
chr13	110280834	110281294	0.030647	-0.11805	10	0.045185	0.16323
chr13	110298384	110298788	0.0019449	-0.128018	18	0.042139	0.17016
chr13	110343419	110343511	0.00486	-0.11113	6	0.017522	0.12865
chr13	110347873	110348025	5.309e-06	-0.147633	9	0.027263	0.1749
chr13	110546935	110547341	0.0017549	-0.103191	16	0.03877	0.14196
chr13	110552519	110552933	0.046731	-0.106105	9	0.040246	0.14635
chr13	110825085	110825192	0.00486	-0.146549	6	0.031652	0.1782
chr13	110869655	110869917	0.0070067	-0.116457	13	0.048601	0.16506
chr13	111119246	111119934	0.046731	-0.100285	8	0.038976	0.13926
chr13	111283119	111283194	0.00032213	-0.11894	7	0.0238	0.14274
chr13	111411282	111411580	0.0088401	-0.130751	23	0.046662	0.17741
chr13	111471285	111471406	0.0174	0.1338	6	0.18132	0.047524
chr13	111584179	111584376	0.04847	-0.102585	13	0.057693	0.16028
chr13	111947180	111947409	0.025239	-0.116315	9	0.013077	0.12939
chr13	111962830	111963014	0.046731	-0.105149	6	0.024935	0.13008
chr13	112252085	112252413	0.014868	0.123216	19	0.1689	0.045684
chr13	112777734	112777869	0.0018332	-0.132185	6	0.016515	0.1487
chr13	112970339	112970707	0.0058179	-0.108484	12	0.008938	0.11742
chr13	112973074	112973223	0.010045	-0.136845	8	0.042182	0.17903
chr13	112982892	112983119	0.046731	-0.105609	10	0.033348	0.13896
chr13	112991775	112992079	0.046731	-0.106922	5	0.025518	0.13244
chr13	112996932	112997114	0.00046966	-0.117928	13	0.027257	0.14518
chr13	113013279	113013959	0.020731	-0.103759	18	0.049283	0.15304
chr13	113129756	113129952	0.013532	-0.102892	14	0.067968	0.17086
chr13	113410846	113411025	0.019493	-0.101277	11	0.030377	0.13165
chr13	113414081	113414209	0.00486	-0.126826	6	0.022401	0.14923
chr13	113471744	113472009	0.0078126	-0.109835	6	0.022839	0.13267
chr13	113737223	113737880	0.00039967	-0.108891	25	0.047638	0.15653
chr13	113840529	113841005	8.3893e-06	-0.122536	19	0.051806	0.17434
chr13	113842243	113842352	0.02495	-0.111669	6	0.044554	0.15622
chr13	113856645	113856823	0.046731	-0.103925	7	0.038363	0.14229
chr13	113861744	113862330	0.026439	-0.120796	16	0.060173	0.18097
chr13	113998613	113998760	0.0070226	-0.130704	10	0.038386	0.16909
chr13	114018026	114018129	0.019653	0.143256	11	0.1757	0.032448
chr13	114038209	114038552	0.00027679	-0.106216	19	0.049968	0.15618
chr13	114060692	114060746	0.044717	-0.106034	9	0.073157	0.17919
chr13	114068336	114068562	0.0072909	-0.118923	9	0.071927	0.19085
chr13	114100059	114100469	0.00040259	-0.10364	24	0.044458	0.1481
chr13	114140091	114140704	6.7826e-06	-0.114442	22	0.028671	0.14311
chr13	114164843	114164962	0.0099105	-0.153959	8	0.026706	0.18066
chr13	114352846	114352904	0.014058	-0.106583	7	0.047407	0.15399
chr13_KI270838v1_alt	64098	64354	0.033787	0.118975	11	0.16673	0.04775
chr14	16055627	16055851	0.048182	0.106999	9	0.14755	0.040552
chr14	18868375	18868744	0.046731	-0.127913	7	0.020338	0.14825
chr14	19716706	19716952	0.0086302	-0.114637	5	0.020476	0.13511
chr14	20434432	20435079	0.016516	-0.118795	11	0.055598	0.17439
chr14	21266887	21267022	0.0032156	-0.145116	11	0.068615	0.21373
chr14	22325437	22325513	0.014058	0.162874	7	0.19798	0.035105
chr14	22556562	22556742	0.00029766	-0.154556	12	0.017822	0.17238
chr14	22560595	22560786	0.025239	-0.112265	6	0.059927	0.17219
chr14	22913179	22913274	0.014058	-0.101886	7	0.047902	0.14979
chr14	22930778	22931034	0.00098429	-0.134832	13	0.044019	0.17885
chr14	23210502	23210604	0.0198	-0.127421	5	0.044888	0.17231
chr14	23300189	23300711	0.0044688	-0.101107	11	0.040035	0.14114
chr14	23513243	23513487	0.00486	-0.156562	13	0.049933	0.2065
chr14	23580519	23580644	0.0078014	-0.111767	6	0.033707	0.14547
chr14	24034689	24035778	0.00014212	-0.123823	17	0.058603	0.18243
chr14	24093602	24093807	0.0010094	-0.139411	9	0.055466	0.19488
chr14	24215177	24215335	0.00486	-0.127597	10	0.041293	0.16889
chr14	24229452	24229509	0.046731	0.151026	5	0.17971	0.028684
chr14	24418289	24418589	0.036346	-0.121395	6	0.031676	0.15307
chr14	30547474	30547549	0.026676	0.100189	7	0.11703	0.016836
chr14	31422475	31422638	0.046731	-0.100686	5	0.03096	0.13165
chr14	31951353	31951566	0.026826	-0.13505	7	0.060612	0.19566
chr14	32932616	32932734	0.026487	-0.147173	7	0.038351	0.18552
chr14	34018807	34019186	0.016401	-0.136593	11	0.058229	0.19482
chr14	34547503	34548076	1.2081e-05	-0.110548	26	0.035282	0.14583
chr14	34693358	34693559	0.00071764	-0.108667	10	0.018185	0.12685
chr14	35332450	35332695	0.0021072	-0.127825	8	0.036497	0.16432
chr14	35344605	35344763	0.0086302	-0.10149	5	0.062022	0.16351
chr14	36518099	36518288	0.046731	0.118194	15	0.17247	0.054273
chr14	36829629	36830365	0.036346	-0.116684	6	0.043975	0.16066
chr14	39447246	39448225	0.00486	-0.102749	9	0.017264	0.12001
chr14	39997810	39998226	0.025328	-0.100615	6	0.035018	0.13563
chr14	41606860	41607050	2.0989e-12	0.11468	31	0.13253	0.01785
chr14	43556156	43556216	0.046731	0.101447	5	0.14612	0.044672
chr14	44150175	44150325	0.0174	0.116316	6	0.14032	0.024002
chr14	44632066	44632231	0.014202	0.131922	9	0.16655	0.03463
chr14	47476926	47477030	0.026289	0.105516	8	0.16776	0.062248
chr14	47675619	47675710	0.00012512	0.105375	15	0.13008	0.024708
chr14	47795572	47795920	0.038887	0.115555	10	0.17036	0.054805
chr14	47914431	47915241	0.048723	-0.105054	9	0.024386	0.12944
chr14	48323739	48324064	0.037553	-0.106709	7	0.026801	0.13351
chr14	49286917	49287488	0.046731	-0.114765	7	0.040876	0.15564
chr14	49560838	49560973	0.00029259	0.108136	8	0.11867	0.010535
chr14	49766832	49767009	0.012115	-0.117222	11	0.058202	0.17542
chr14	49853669	49853791	0.00029652	-0.137916	8	0.018954	0.15687
chr14	50000910	50001962	0.0010105	-0.119749	15	0.036404	0.15615
chr14	50083745	50083871	0.036346	-0.132415	6	0.036449	0.16886
chr14	50774419	50774854	0.0050754	-0.14199	5	0.016476	0.15847
chr14	51377717	51378057	0.014058	-0.15206	5	0.050342	0.2024
chr14	51650604	51650686	0.044372	-0.103689	9	0.057117	0.16081
chr14	51827994	51828855	6.98e-05	-0.116559	10	0.029743	0.1463
chr14	52701697	52701798	0.036346	0.123447	6	0.16533	0.041884
chr14	52791965	52792210	0.0086302	-0.114329	5	0.021074	0.1354
chr14	52983872	52984079	0.046731	0.106678	5	0.11677	0.010096
chr14	53011292	53011590	0.0174	-0.143579	6	0.034229	0.17781
chr14	53390257	53390382	0.0086302	-0.110919	5	0.0052527	0.11617
chr14	53510016	53510204	0.0198	-0.15453	5	0.015802	0.17033
chr14	53879251	53879507	0.046731	-0.125419	5	0.047488	0.17291
chr14	54758437	54758722	0.046731	-0.143541	6	0.062329	0.20587
chr14	55105882	55106605	0.0069155	-0.125352	10	0.050145	0.1755
chr14	55461443	55461845	0.046731	-0.158681	7	0.056909	0.21559
chr14	55599368	55599720	0.013613	-0.116643	14	0.041406	0.15805
chr14	55850921	55851634	0.046731	-0.127457	5	0.029423	0.15688
chr14	55938600	55938723	0.046731	-0.116117	6	0.048317	0.16443
chr14	56220533	56221960	0.0044415	-0.110354	17	0.058186	0.16854
chr14	56704053	56704286	0.012115	-0.106527	6	0.055111	0.16164
chr14	58287481	58287723	0.0198	-0.110786	5	0.028955	0.13974
chr14	58396475	58396750	0.00054631	-0.181572	9	0.062046	0.24362
chr14	58749102	58749461	0.014058	-0.142397	5	0.021274	0.16367
chr14	60652896	60653658	3.8523e-10	-0.10541	42	0.047334	0.15274
chr14	60686504	60686580	0.046731	0.10708	5	0.15872	0.051639
chr14	61189177	61189240	0.012115	-0.10252	6	0.011075	0.1136
chr14	61279907	61280020	0.046731	-0.12487	5	0.027654	0.15252
chr14	63524901	63525111	0.026826	-0.116025	7	0.062233	0.17826
chr14	63873668	63874460	0.043633	-0.110053	11	0.063303	0.17336
chr14	64234912	64235015	0.036346	-0.109526	6	0.05054	0.16007
chr14	64468619	64469068	0.031519	-0.113709	5	0.031714	0.14542
chr14	64506074	64507004	0.0030503	-0.105025	22	0.07454	0.17957
chr14	64601808	64601915	0.046731	0.10152	11	0.1658	0.064278
[truncated: 5,712 more rows]
